# Supplementary material
Source: Royal Society of Chemistry journal article supplement (doi:10.1039/d6em00025h)
Supplement: d6em00025h1.pdf [file d6em00025h1.pdf]

Supplementary material

---

**Hydrolysis pathways and kinetics of chlorantraniliprole and cyantraniliprole:**

**Density Functional Theory Investigation**

Tong Xu, Yueli Lan, Yuanning He, Zhinan Chen, Mengzhen Hao, Meijuan Zhang,

Jieying Xiao\*, Chun Liu

*Pollution Prevention Biotechnology Laboratory of Hebei Province, College of Environmental Science and Engineering, Hebei University of Science and Technology, Shijiazhuang 050000, China*

Number of tables: 4; Number of figures: 12; Number of pages: 43

**Content**

|                                                                                                                                                                   |   |
|-------------------------------------------------------------------------------------------------------------------------------------------------------------------|---|
| <b>Text S1.</b> $\Delta G^\ddagger$ correction.....                                                                                                               | 3 |
| <b>Table S1.</b> Experimental $k_B$ values of CLAP and CNAP. ....                                                                                                 | 3 |
| <b>Table S2.</b> Comparison of $\log k_B$ calculated by B3LYP and M062X functionals and experimental $\log k_B$ for CLAP and CNAP.....                            | 3 |
| <b>Table S3.</b> Comparison between $\log k_{B1}$ calculated with different types of implicit solvation models and experimental $\log k_B$ for CLAP and CNAP..... | 3 |
| <b>Table S4.</b> The product branching ratio for each feasible hydrolysis pathway of CLAP and CNAP. ....                                                          | 4 |
| <b>Figure S1.</b> Potential hydrolysis pathways for CNAP.....                                                                                                     | 5 |
| <b>Figure S2.</b> Schematic free energy surfaces for hydrolysis of C-N bond on pyrazole of CNAP.....                                                              | 6 |
| <b>Figure S3.</b> Schematic free energy surfaces for neutral hydrolysis of amide bond.....                                                                        | 7 |
| <b>Figure S4.</b> Schematic free energy surfaces for neutral hydrolysis of halogen bonds. ...                                                                     | 8 |
| <b>Figure S5.</b> Schematic free energy surfaces for neutral hydrolysis of C-N bond intermediates, and products involved in the reaction, respectively. ....      | 9 |

|                                                                                                                            |    |
|----------------------------------------------------------------------------------------------------------------------------|----|
| <b>Figure S6.</b> The rearrangement–dehydration–cyclization reaction pathway of CLAP.<br>.....                             | 10 |
| <b>Figure S7.</b> The potential energy surface of the rearrangement–dehydration–cyclization reaction of CLAP. ....         | 10 |
| <b>Figure S8.</b> Structures of transition states of base-catalyzed hydrolysis of CLAP.....                                | 11 |
| <b>Figure S9.</b> Structures of transition states of neutral hydrolysis of CLAP. ....                                      | 12 |
| <b>Figure S10.</b> Structures of transition states (TS) of the rearrangement–dehydration–cyclization reaction of CLAP..... | 13 |
| <b>Figure S11.</b> Structures of transition states of base-catalyzed hydrolysis of CNAP. ...                               | 14 |
| <b>Figure S12.</b> Structures of transition states of neutral hydrolysis of CNAP.....                                      | 15 |
| <b>Cartesian Coordinates of Optimized Structures</b> .....                                                                 | 16 |
| <b>References</b> .....                                                                                                    | 43 |

**Text S1.**  $\Delta G^\ddagger$  correction.

During the DFT calculations, the aqueous molar standard state was considered for all reactions. Due to the change in standard state from 1 atm to 1 M aqueous standard state, the calculated  $\Delta G^\ddagger$  was corrected by adding  $7.9 \text{ kJ}\cdot\text{mol}^{-1}$  for the reaction type of  $A \rightarrow B + C$ , and reducing  $7.9 \text{ kJ}\cdot\text{mol}^{-1}$  for the reaction type of  $A + B \rightarrow C$ .<sup>1</sup>

**Table S1.** Experimental  $k_B$  values of CLAP and CNAP.

| Name | $k_B$ ( $\text{mol}^{-1}\cdot\text{L}\cdot\text{s}^{-1}$ ) |
|------|------------------------------------------------------------|
| CLAP | $7.99 \times 10^{-2}$                                      |
| CNAP | $9.44 \times 10^{-1}$                                      |

**Table S2.** Comparison of  $\log k_{B1}$  ( $\text{mol}^{-1}\cdot\text{L}\cdot\text{s}^{-1}$ ) calculated by B3LYP and M062X functionals and experimental  $\log k_B$  for CLAP and CNAP, respectively.

## Supplementary material

| Name | Methods | $\log k_{B1-DFT}$ | $\log k_{B-1exp}$ |
|------|---------|-------------------|-------------------|
| CLAP | B3LYP   | -1.25             | -1.10             |
|      | M06-2X  | 4.16              |                   |
| CNAP | B3LYP   | -0.12             | -0.03             |
|      | M06-2X  | 4.74              |                   |

**Table S3.** Comparison between  $\log k_{B1}$  calculated with different types of implicit solvation models and experimental  $\log k_B$  for CLAP and CNAP.

| Name | Methods                        | $\log k_{B1-DFT}$ | $\log k_{B-1exp}$ |
|------|--------------------------------|-------------------|-------------------|
| CLAP | IEFPCM/B3LYP/6-311++G(3df,2pd) | -1.25             | -1.10             |
|      | SMD/B3LYP/6-311++G(3df,2pd)    | -6.28             |                   |
| CNAP | IEFPCM/B3LYP/6-311++G(3df,2pd) | -0.12             | -0.03             |
|      | SMD/B3LYP/6-311++G(3df,2pd)    | -5.05             |                   |

**Table S4.** The product branching ratio for each feasible hydrolysis pathway of CLAP and CNAP.

| Name | Pathway                                 | Product Branching ratio (%) |
|------|-----------------------------------------|-----------------------------|
| CLAP | Amide bond on benzene                   | $3.34 \times 10^{-10}$      |
|      | Amide bond between benzene and pyrazole | 99.99                       |
|      | C-Cl bond on benzene                    | $1.09 \times 10^{-3}$       |
|      | C-Cl bond on pyridine                   | $7.52 \times 10^{-3}$       |
|      | C-Br bond on pyrazole                   | $1.01 \times 10^{-3}$       |
| CNAP | Amide bond on benzene                   | $9.12 \times 10^{-10}$      |
|      | Amide bond between benzene and pyrazole | 99.99                       |
|      | C-Cl bond on pyridine                   | $6.46 \times 10^{-4}$       |

---

Supplementary material

---

|                       |                       |
|-----------------------|-----------------------|
| Cyano group           | $4.53 \times 10^{-9}$ |
| C-Br bond on pyrazole | $2.92 \times 10^{-4}$ |

---

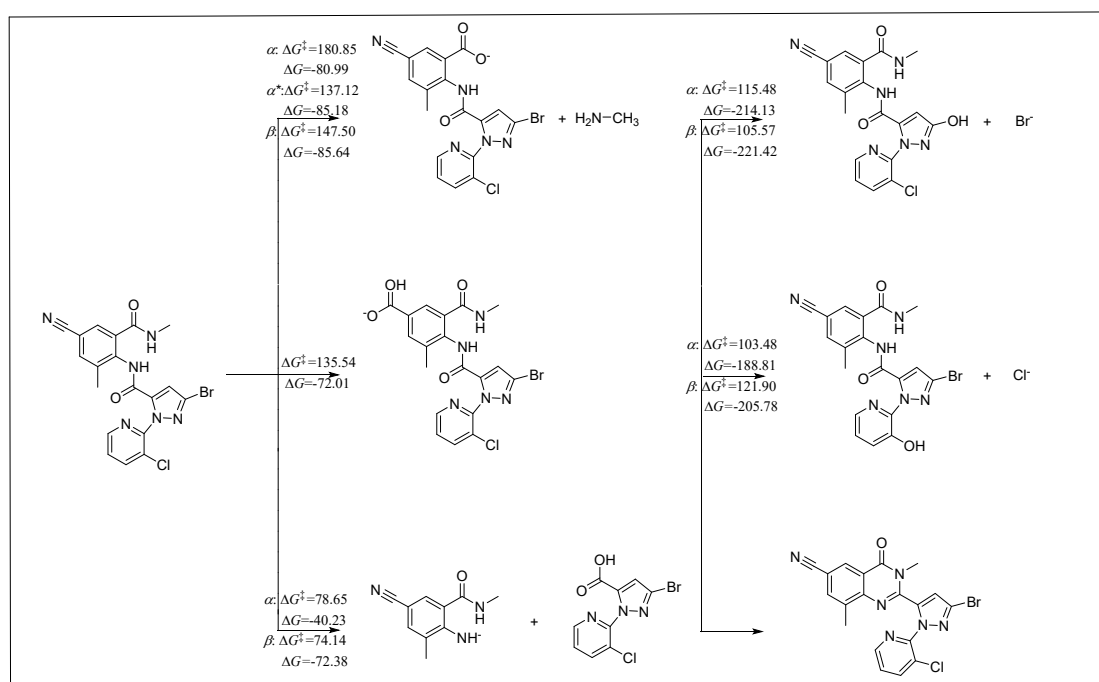

**Figure S1.** Potential hydrolysis pathways and the corresponding Gibbs free energies of reaction ( $\Delta G$ ,  $\text{kJ}\cdot\text{mol}^{-1}$ ) and Gibbs free energies of activation ( $\Delta G^\ddagger$ ,  $\text{kJ}\cdot\text{mol}^{-1}$ ) for CNAP calculated at IEFPCM/B3LYP/6-311++G(3df,2pd) //IEFPCM/B3LYP/6-311++G(d,p) level.

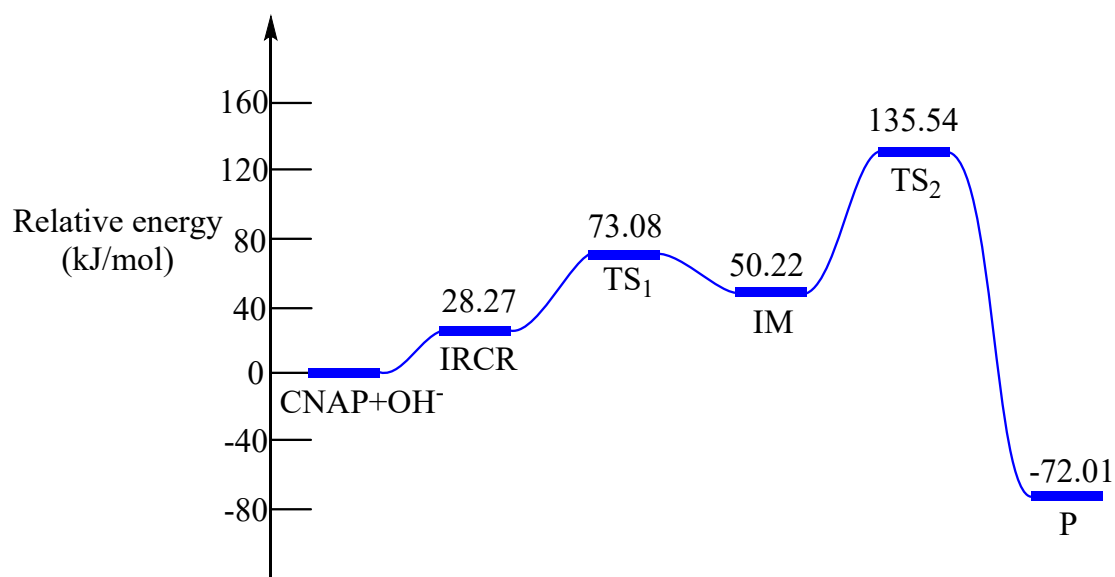

**Figure S2.** Schematic free energy surfaces for hydrolysis of C-N bond on pyrazole of CNAP calculated at IEFPCM/B3LYP/6-311++G(d,p) level. [The total energy of the reactants and OH<sup>-</sup> is set to zero (reference state). The symbols “IRCR, TS, IM, P” refer to pre-reactive complexes, transition states, intermediates, and products involved in the reaction, respectively.]

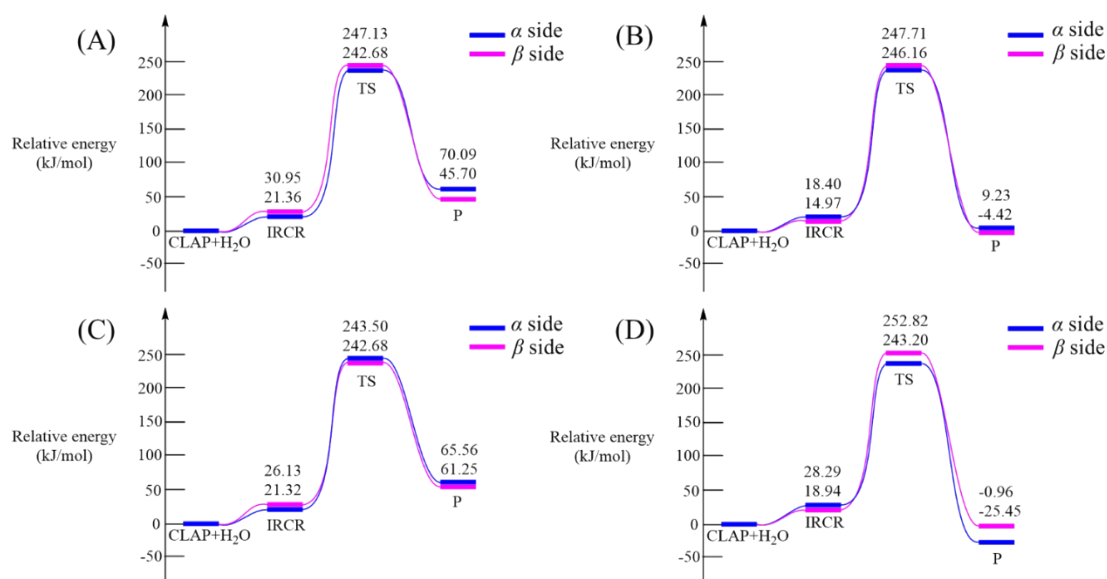

**Figure S3.** Schematic free energy surfaces for neutral hydrolysis of the amide bond on benzene of CLAP (A) and CNAP (C), and the amide bond between benzene and pyrazole of CLAP (B) and CNAP (D) calculated at IEFPCM/B3LYP/6-311++G(3df,2pd) //IEFPCM/B3LYP/6-311++G(d,p) level. [The total energy of the reactants and H<sub>2</sub>O is set to zero (reference state). The symbols “IRCR, TS, P” refer to pre-reactive complexes, transition states, and products involved in the reaction, respectively. The  $\alpha$  and  $\beta$  sides are shown in Figure 1.]

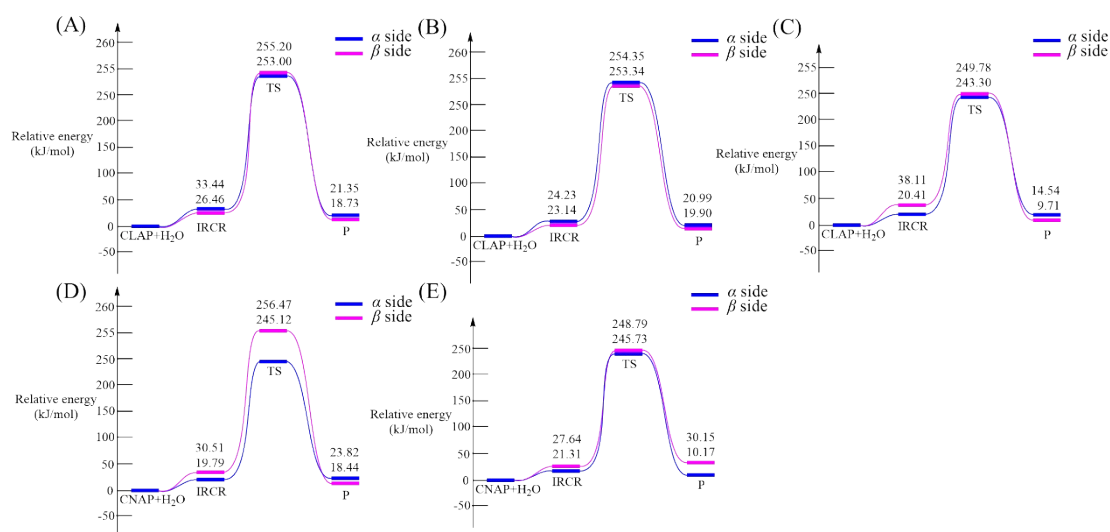

**Figure S4.** Schematic free energy surfaces for neutral hydrolysis of (A) C-Br bond on pyrazole of CLAP; (B) C-Cl bond on benzene of CLAP; (C) C-Cl bond on pyridine of CLAP; (D) C-Br bond on pyrazole of CNAP; and (E) C-Cl bond on pyridine of CNAP calculated at IEFPCM/B3LYP/6-311++G(d,p) level. [The total energy of the reactants and H<sub>2</sub>O is set to zero (reference state). The symbols “IRCR, TS, P” refer to pre-reactive complexes, transition states, and products involved in the reaction, respectively. The  $\alpha$  and  $\beta$  sides are shown in Figure 1.]

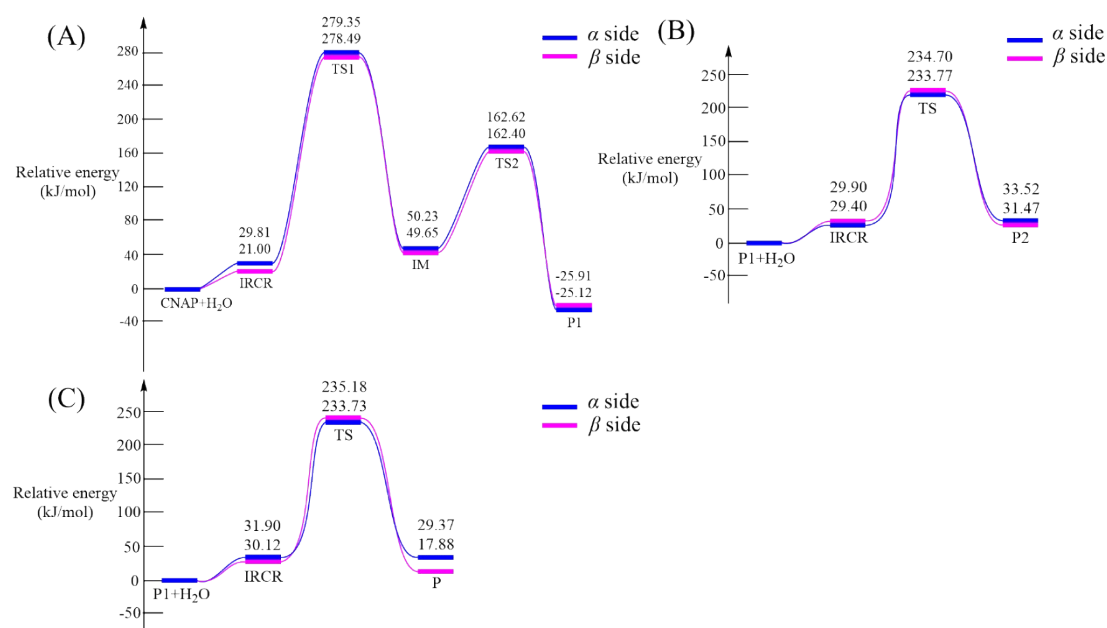

**Figure S5.** Schematic free energy surfaces for neutral hydrolysis of C-N bond on pyrazole of CNAP calculated at IEFPCM/B3LYP/6-311++G(d,p) level. (A) is the first step of neutral hydrolysis of CNAP, producing the intermediate product P1. (B) is the second step where the product P1, formed via nucleophilic attack at the  $\alpha$  side, undergoes further neutral hydrolysis. (C) is the second step where the product P1, formed via nucleophilic attack at the  $\beta$  side, undergoes further neutral hydrolysis. [The total energy of the reactants and H<sub>2</sub>O is set to zero (reference state). The symbols “IRCR, TS, IM, P” refer to pre-reactive complexes, transition states, intermediates, and products involved in the reaction, respectively. The  $\alpha$  and  $\beta$  sides are shown in Figure 1.]

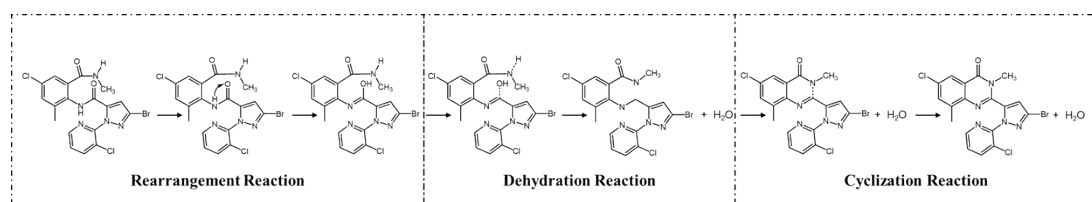

**Figure S6.** The rearrangement–dehydration–cyclization reaction pathway of CLAP.

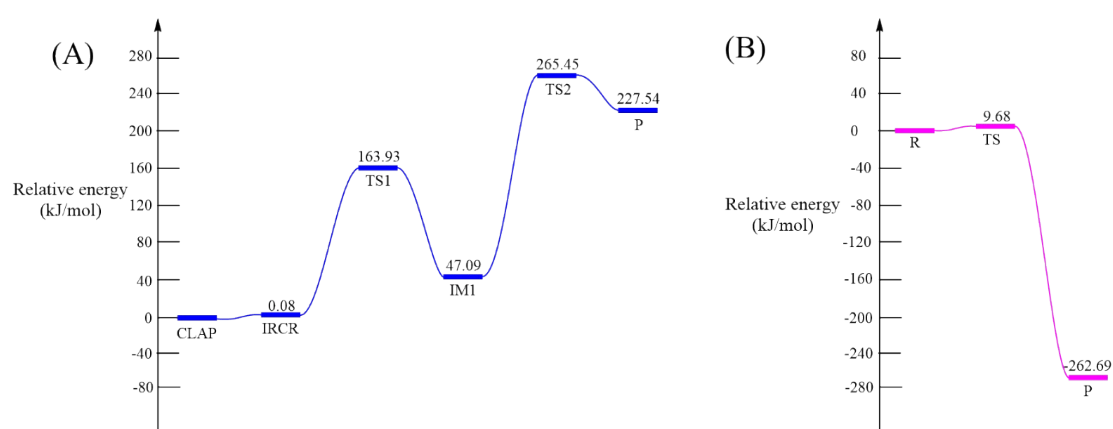

**Figure S7.** The potential energy surface of the rearrangement–dehydration–cyclization reaction of CLAP. (A) is the rearrangement–dehydration reaction of CLAP, (B) is the cyclization reaction of CLPA. [The total energy of the reactants is set to zero (reference state). The symbols “IRCR, TS, IM, P” refer to pre-reactive complexes, transition states, intermediates, and products involved in the reaction, respectively.]

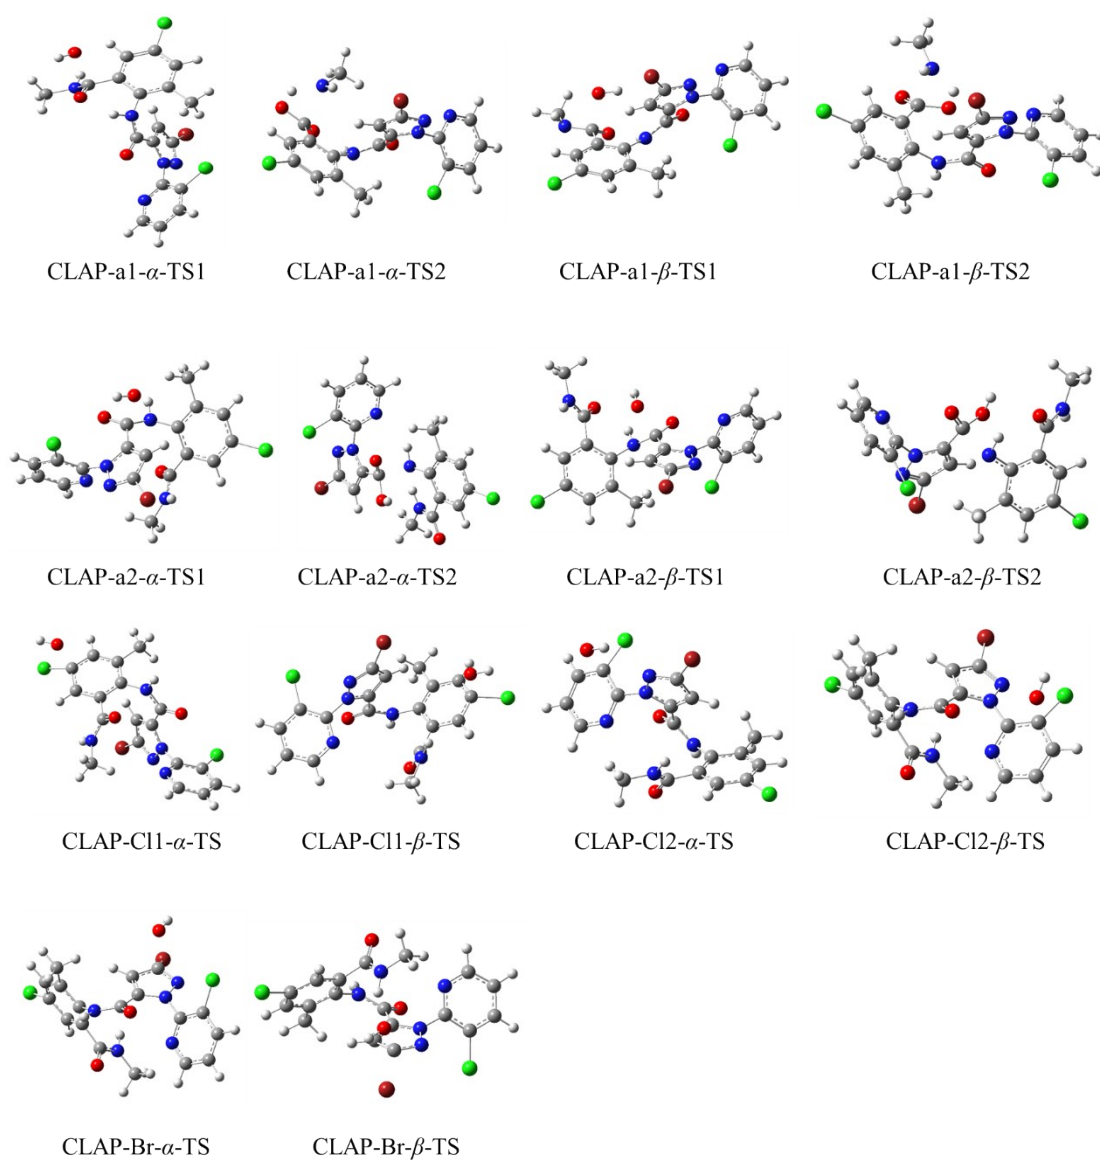

**Figure S8.** Structures of transition states (TS) of base-catalyzed hydrolysis of CLAP.

[The symbols “a1, a2, C11, C12 and Br” refer to amide bond on benzene, amide bond between benzene and pyrazole, C-Cl bond on benzene, C-Cl bond on pyridine and C-Br bond on pyrazole, respectively. The  $\alpha$  and  $\beta$  sides are shown in Figure 1.]

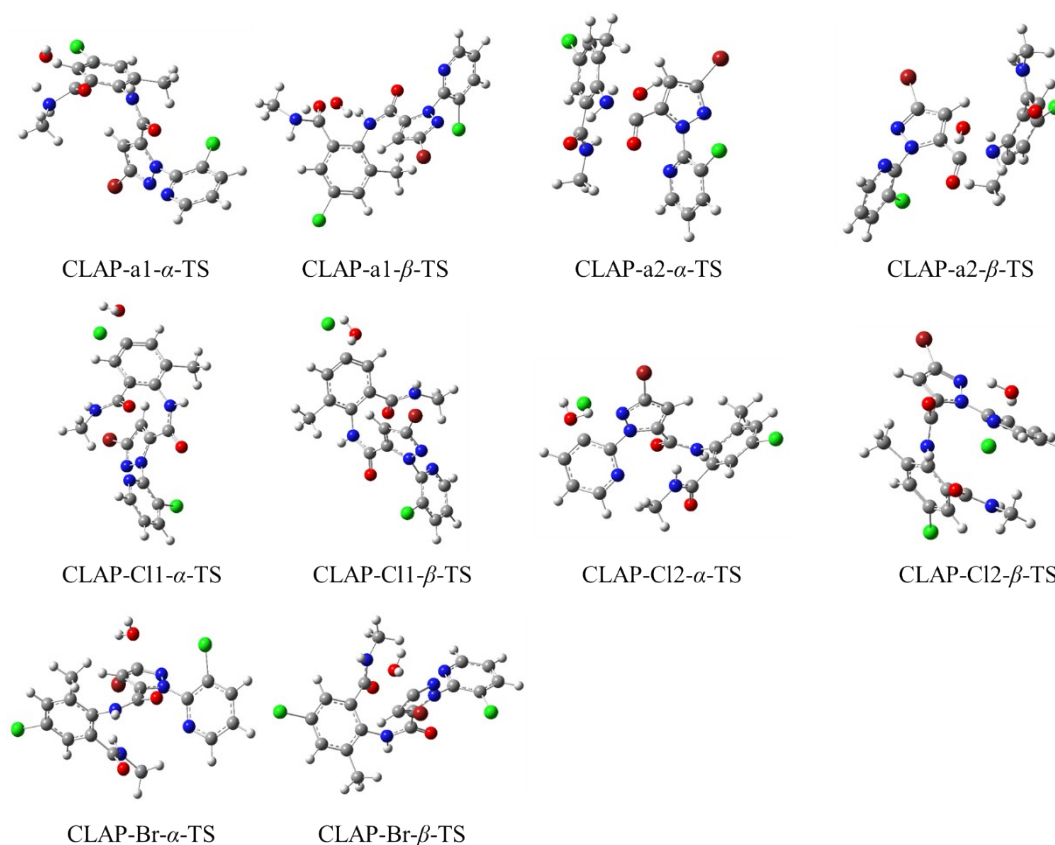

**Figure S9.** Structures of transition states (TS) of neutral hydrolysis of CLAP. [The symbols “a1, a2, C11, C12 and Br” refer to amide bond on benzene, amide bond between benzene and pyrazole, C-Cl bond on benzene, C-Cl bond on pyridine and C-Br bond on pyrazole, respectively. The  $\alpha$  and  $\beta$  sides are shown in Figure 1.]

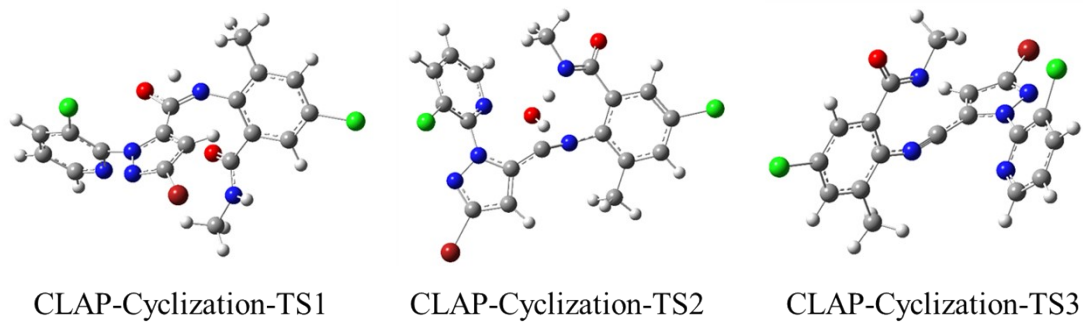

**Figure S10.** Structures of transition states (TS) of the rearrangement–dehydration–cyclization reaction of CLAP.

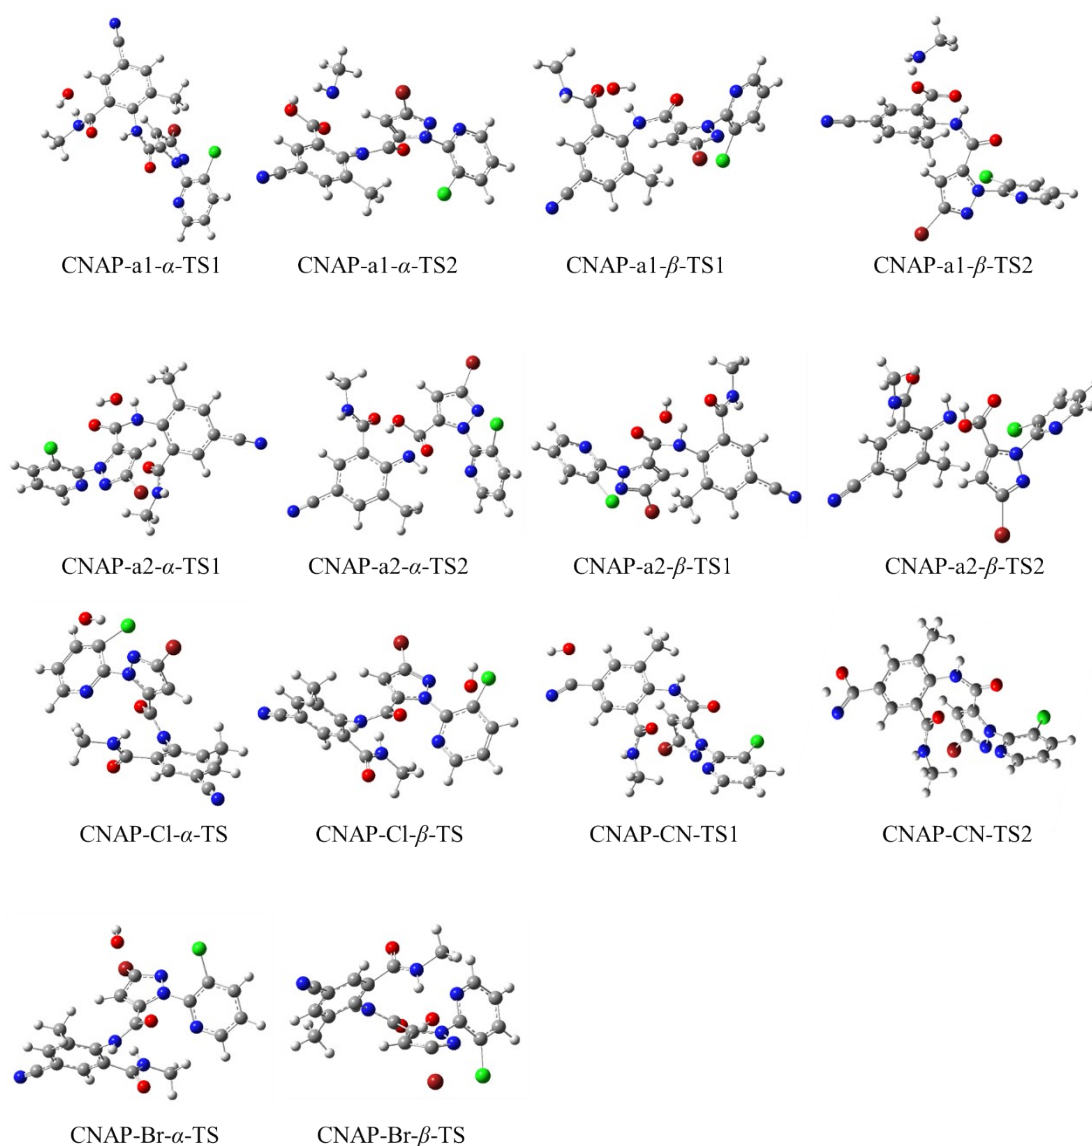

**Figure S11.** Structures of transition states (TS) of base-catalyzed hydrolysis of CNAP. [The symbols “a1, a2, Cl, CN and Br” refer to amide bond on benzene, amide bond between benzene and pyrazole, C-Cl bond on benzene, Cyano group and C-Br bond on pyrazole, respectively. The  $\alpha$  and  $\beta$  sides are shown in Figure 1.]

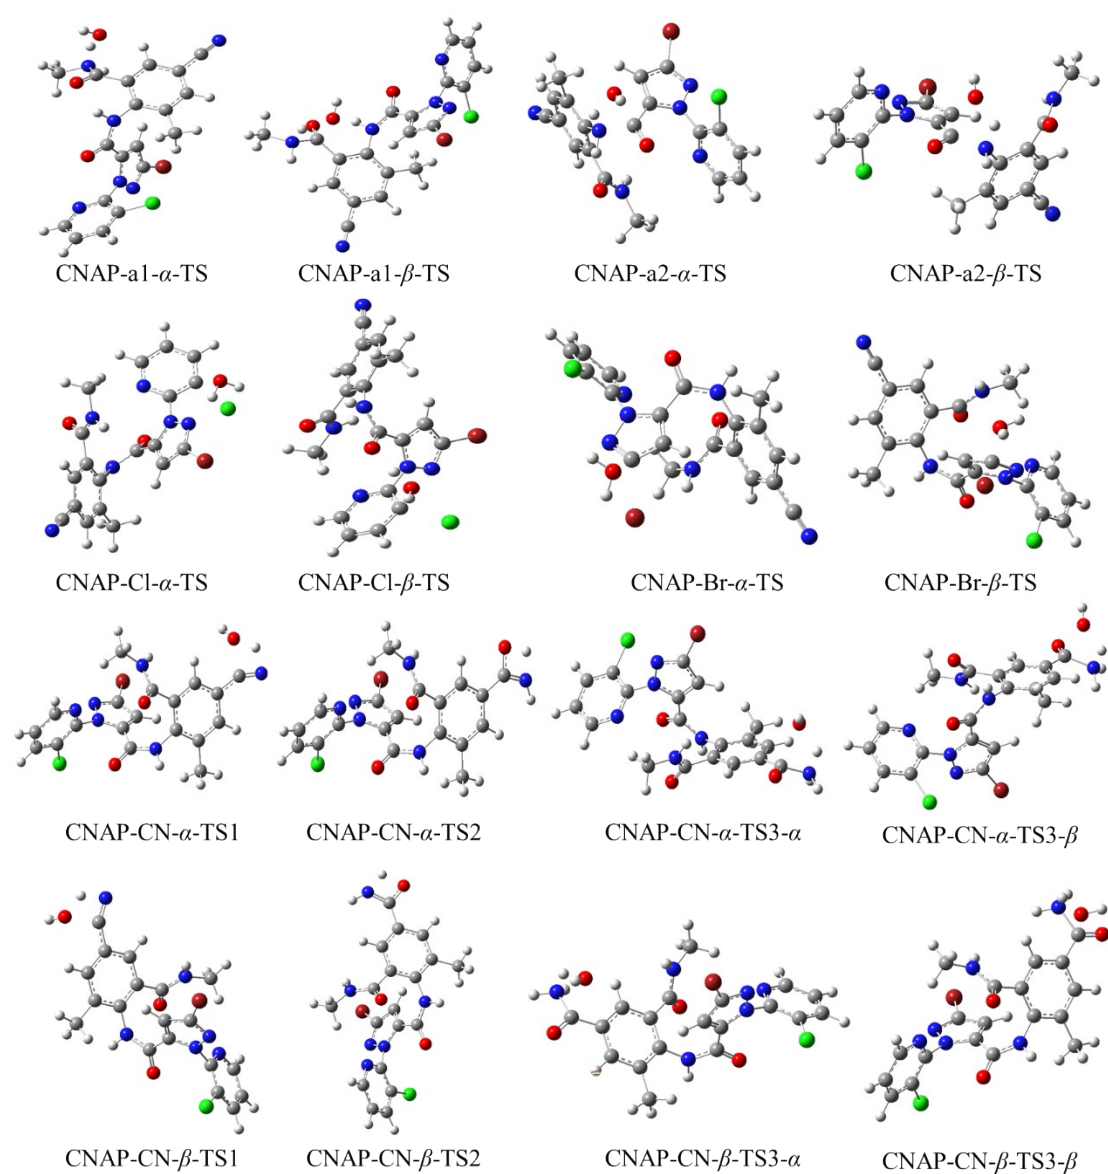

**Figure S12.** Structures of transition states (TS) of neutral hydrolysis of CNAP. [The symbols “a1, a2, Cl, CN and Br” refer to amide bond on benzene, amide bond between benzene and pyrazole, C-Cl bond on benzene, Cyano group and C-Br bond on pyrazole, respectively. The  $\alpha$  and  $\beta$  sides are shown in Figure 1.]

---

**Cartesian Coordinates of Optimized Structures**Amide bond on benzene of CLAP -  $\alpha$  side -TS1.xyz

|    | x        | y        | z        |
|----|----------|----------|----------|
| C  | -2.78222 | 0.99146  | 2.07822  |
| C  | -1.69928 | 0.1306   | 1.88543  |
| C  | -1.76753 | -0.80902 | 0.83713  |
| C  | -2.94651 | -0.96672 | 0.07964  |
| C  | -4.01445 | -0.09626 | 0.29762  |
| C  | -3.90706 | 0.88308  | 1.27183  |
| H  | -2.74989 | 1.72652  | 2.87277  |
| H  | -4.92475 | -0.23003 | -0.2675  |
| Cl | -5.26248 | 1.9902   | 1.53599  |
| C  | -0.51412 | 0.22101  | 2.81376  |
| H  | 0.27267  | 0.86354  | 2.40909  |
| H  | -0.81889 | 0.64093  | 3.77382  |
| H  | -0.07397 | -0.76197 | 2.99054  |
| C  | -3.03896 | -2.08124 | -0.96706 |
| O  | -2.46551 | -3.18163 | -0.75168 |
| N  | -3.08133 | -1.57204 | -2.27302 |
| H  | -3.70734 | -0.78276 | -2.36186 |
| C  | -3.19634 | -2.51713 | -3.37808 |
| H  | -3.15866 | -1.9642  | -4.31796 |
| H  | -2.36025 | -3.21574 | -3.35185 |
| H  | -4.12982 | -3.093   | -3.34195 |
| N  | -0.68339 | -1.70214 | 0.58909  |
| H  | -1.01082 | -2.64637 | 0.36714  |
| C  | 0.5803   | -1.47218 | 0.13727  |
| O  | 1.36166  | -2.40883 | -0.04641 |
| C  | 1.0202   | -0.08791 | -0.19434 |
| C  | 0.32282  | 1.05435  | -0.55693 |
| N  | 2.35357  | 0.21459  | -0.33976 |
| C  | 1.32382  | 1.97843  | -0.8932  |
| H  | -0.74176 | 1.19832  | -0.58904 |
| N  | 2.54406  | 1.4834   | -0.76437 |
| Br | 1.07564  | 3.75992  | -1.47885 |
| C  | 3.51633  | -0.61424 | -0.1848  |
| C  | 4.03801  | -0.90177 | 1.07783  |
| N  | 4.08884  | -1.02117 | -1.30864 |
| C  | 5.18609  | -1.68173 | 1.16332  |
| C  | 5.19732  | -1.76224 | -1.22787 |
| C  | 5.77579  | -2.12489 | -0.01434 |
| H  | 5.60764  | -1.92498 | 2.13     |
| H  | 5.636    | -2.07585 | -2.16879 |
| H  | 6.67102  | -2.73301 | 0.00967  |
| Cl | 3.28654  | -0.3003  | 2.53656  |
| O  | -4.99011 | -2.48441 | -0.62783 |
| H  | -4.93335 | -3.40806 | -0.89628 |

## Supplementary material

Amide bond on benzene of CLAP -  $\alpha$  side -TS2.xyz

|    | x        | y        | z        |
|----|----------|----------|----------|
| C  | -3.02231 | 0.67427  | 2.05613  |
| C  | -1.86703 | -0.0915  | 1.85353  |
| C  | -1.84995 | -1.01431 | 0.79416  |
| C  | -3.00806 | -1.24897 | 0.01537  |
| C  | -4.14967 | -0.47908 | 0.24862  |
| C  | -4.13129 | 0.48458  | 1.24693  |
| H  | -3.05213 | 1.39628  | 2.8625   |
| H  | -5.03532 | -0.65305 | -0.34506 |
| Cl | -5.57741 | 1.46479  | 1.52413  |
| C  | -0.7031  | 0.08283  | 2.79645  |
| H  | 0.0159   | 0.81701  | 2.4232   |
| H  | -1.05581 | 0.43244  | 3.76816  |
| H  | -0.1664  | -0.85631 | 2.94123  |
| C  | -3.07393 | -2.37721 | -0.9853  |
| O  | -2.43826 | -3.42607 | -0.78167 |
| N  | -2.31718 | -1.19462 | -2.70447 |
| H  | -1.97424 | -0.2623  | -2.47792 |
| C  | -1.28729 | -1.92402 | -3.42274 |
| H  | -0.32086 | -1.97765 | -2.89046 |
| H  | -1.61471 | -2.95891 | -3.58144 |
| H  | -1.06692 | -1.51217 | -4.42314 |
| N  | -0.70435 | -1.81621 | 0.53147  |
| H  | -0.95822 | -2.77312 | 0.27417  |
| C  | 0.55658  | -1.48843 | 0.13159  |
| O  | 1.40009  | -2.36723 | -0.05971 |
| C  | 0.9182   | -0.06835 | -0.13592 |
| C  | 0.16005  | 1.04453  | -0.46625 |
| N  | 2.23329  | 0.31971  | -0.23968 |
| C  | 1.1087   | 2.04039  | -0.74286 |
| H  | -0.91034 | 1.12752  | -0.51035 |
| N  | 2.35401  | 1.61436  | -0.60792 |
| Br | 0.76395  | 3.82731  | -1.25878 |
| C  | 3.4439   | -0.43839 | -0.08783 |
| C  | 3.95168  | -0.74792 | 1.17543  |
| N  | 4.0723   | -0.75213 | -1.21163 |
| C  | 5.14994  | -1.44838 | 1.25916  |
| C  | 5.22858  | -1.41655 | -1.13188 |
| C  | 5.80046  | -1.79292 | 0.0805   |
| H  | 5.56266  | -1.70605 | 2.22593  |
| H  | 5.71234  | -1.65482 | -2.07277 |
| H  | 6.73645  | -2.33621 | 0.10349  |
| Cl | 3.12141  | -0.27051 | 2.63728  |
| O  | -4.19819 | -2.3955  | -1.77992 |
| H  | -3.78688 | -1.77203 | -2.49844 |

## Supplementary material

Amide bond on benzene of CLAP -  $\beta$  side -TS1.xyz

|    | x        | y        | z        |
|----|----------|----------|----------|
| C  | -2.81318 | 1.12077  | 2.02183  |
| C  | -1.72783 | 0.26265  | 1.8056   |
| C  | -1.82506 | -0.70274 | 0.78851  |
| C  | -3.0319  | -0.89133 | 0.07235  |
| C  | -4.10729 | -0.04298 | 0.3377   |
| C  | -3.97148 | 0.96866  | 1.27945  |
| H  | -2.75374 | 1.87796  | 2.79359  |
| H  | -5.05057 | -0.18422 | -0.16978 |
| Cl | -5.3371  | 2.05328  | 1.57867  |
| C  | -0.52041 | 0.38465  | 2.70149  |
| H  | 0.22095  | 1.07782  | 2.29499  |
| H  | -0.81812 | 0.76136  | 3.68167  |
| H  | -0.02754 | -0.57893 | 2.83985  |
| C  | -3.20153 | -2.08529 | -0.86437 |
| O  | -2.64292 | -3.17032 | -0.54889 |
| N  | -4.43281 | -2.12753 | -1.53501 |
| H  | -4.59991 | -1.27049 | -2.04612 |
| C  | -4.70122 | -3.306   | -2.35436 |
| H  | -5.67421 | -3.17785 | -2.83203 |
| H  | -3.94312 | -3.46657 | -3.13008 |
| H  | -4.74128 | -4.19514 | -1.72514 |
| N  | -0.76606 | -1.61786 | 0.53342  |
| H  | -1.13431 | -2.55254 | 0.31385  |
| C  | 0.52103  | -1.44017 | 0.12858  |
| O  | 1.26967  | -2.40989 | -0.02174 |
| C  | 1.02601  | -0.0801  | -0.20931 |
| C  | 0.38245  | 1.0878   | -0.58878 |
| N  | 2.37268  | 0.1634   | -0.34313 |
| C  | 1.42537  | 1.96515  | -0.92144 |
| H  | -0.67501 | 1.2746   | -0.63299 |
| N  | 2.62199  | 1.41896  | -0.77598 |
| Br | 1.2613   | 3.75095  | -1.52333 |
| C  | 3.49681  | -0.71349 | -0.16901 |
| C  | 4.00097  | -0.9995  | 1.10103  |
| N  | 4.0531   | -1.16816 | -1.28267 |
| C  | 5.11067  | -1.83081 | 1.20644  |
| C  | 5.1249   | -1.95915 | -1.18284 |
| C  | 5.68179  | -2.32483 | 0.03989  |
| H  | 5.51745  | -2.07447 | 2.17931  |
| H  | 5.55139  | -2.31153 | -2.11562 |
| H  | 6.54708  | -2.97409 | 0.07922  |
| Cl | 3.27396  | -0.33346 | 2.54415  |
| O  | -2.17794 | -1.23735 | -2.36492 |
| H  | -1.24464 | -1.34702 | -2.15058 |

## Supplementary material

Amide bond on benzene of CLAP -  $\beta$  side -TS2.xyz

|    | x        | y        | z        |
|----|----------|----------|----------|
| C  | 3.80144  | 0.52743  | -1.85919 |
| C  | 2.54359  | 0.02659  | -2.1855  |
| C  | 1.91999  | -0.88872 | -1.30843 |
| C  | 2.56184  | -1.32739 | -0.1381  |
| C  | 3.83884  | -0.82431 | 0.15244  |
| C  | 4.4268   | 0.09534  | -0.69179 |
| H  | 4.29308  | 1.23684  | -2.51245 |
| H  | 4.34454  | -1.16224 | 1.04612  |
| Cl | 6.02488  | 0.7374   | -0.29224 |
| C  | 1.87741  | 0.44893  | -3.47242 |
| H  | 0.89651  | 0.89623  | -3.29243 |
| H  | 2.49268  | 1.17789  | -4.00098 |
| H  | 1.72009  | -0.40771 | -4.13401 |
| C  | 2.03616  | -2.40027 | 0.79981  |
| O  | 2.78648  | -3.33938 | 1.08301  |
| N  | 1.68256  | -1.04418 | 2.53014  |
| H  | 1.97541  | -0.08525 | 2.34714  |
| C  | 2.40673  | -1.54725 | 3.68174  |
| H  | 3.50723  | -1.54072 | 3.55589  |
| H  | 2.20206  | -0.99777 | 4.61757  |
| H  | 2.12519  | -2.59063 | 3.87016  |
| N  | 0.65979  | -1.43649 | -1.72777 |
| H  | 0.69777  | -2.26907 | -2.3047  |
| C  | -0.60469 | -1.14541 | -1.33292 |
| O  | -1.55968 | -1.83434 | -1.69549 |
| C  | -0.84946 | 0.06627  | -0.50021 |
| C  | -0.11173 | 1.21395  | -0.25178 |
| N  | -2.06196 | 0.2514   | 0.11734  |
| C  | -0.96594 | 2.01383  | 0.52281  |
| H  | 0.88388  | 1.44944  | -0.57949 |
| N  | -2.13481 | 1.44042  | 0.75626  |
| Br | -0.59598 | 3.73639  | 1.21278  |
| C  | -3.18263 | -0.63697 | 0.24097  |
| C  | -4.31794 | -0.45788 | -0.55217 |
| N  | -3.09748 | -1.56693 | 1.17973  |
| C  | -5.40551 | -1.30104 | -0.35791 |
| C  | -4.13963 | -2.38463 | 1.36117  |
| C  | -5.31286 | -2.28663 | 0.61877  |
| H  | -6.29733 | -1.18822 | -0.96061 |
| H  | -4.03082 | -3.13843 | 2.13314  |
| H  | -6.13734 | -2.96421 | 0.8003   |
| Cl | -4.37699 | 0.77677  | -1.78744 |
| O  | 0.66467  | -2.54163 | 0.90036  |
| H  | 0.56924  | -1.8684  | 1.66493  |

## Supplementary material

Amide bond between benzene and pyrazole of CLAP -  $\alpha$  side -TS1.xyz

|    | x        | y        | z        |
|----|----------|----------|----------|
| C  | 4.30032  | -1.02141 | -1.09804 |
| C  | 3.07797  | -1.65045 | -1.35379 |
| C  | 2.04633  | -1.56172 | -0.39439 |
| C  | 2.28947  | -0.91073 | 0.82975  |
| C  | 3.50541  | -0.25798 | 1.05473  |
| C  | 4.49187  | -0.31657 | 0.08183  |
| H  | 5.09505  | -1.07485 | -1.83195 |
| H  | 3.68872  | 0.2507   | 1.99235  |
| Cl | 6.03478  | 0.49578  | 0.36547  |
| C  | 2.88072  | -2.41409 | -2.63702 |
| H  | 1.95981  | -2.08778 | -3.1282  |
| H  | 3.73189  | -2.27148 | -3.30483 |
| H  | 2.79344  | -3.48981 | -2.44218 |
| C  | 1.33802  | -1.00503 | 2.00282  |
| O  | 1.05059  | -2.09051 | 2.51164  |
| N  | 0.91601  | 0.17284  | 2.50736  |
| H  | 1.11603  | 1.01523  | 1.9902   |
| C  | 0.07145  | 0.26316  | 3.69291  |
| H  | -0.02355 | 1.31249  | 3.96823  |
| H  | -0.92155 | -0.14969 | 3.49915  |
| H  | 0.52538  | -0.28208 | 4.52246  |
| N  | 0.79318  | -2.18549 | -0.63237 |
| H  | 0.85647  | -3.10095 | -1.05957 |
| C  | -0.42393 | -1.58468 | -1.01931 |
| O  | -1.42472 | -2.31435 | -1.12292 |
| C  | -0.62332 | -0.13262 | -0.66489 |
| C  | 0.13211  | 1.0138   | -0.85497 |
| N  | -1.78004 | 0.2753   | -0.05225 |
| C  | -0.65786 | 2.04323  | -0.3251  |
| H  | 1.08444  | 1.09228  | -1.34558 |
| N  | -1.81276 | 1.61815  | 0.16287  |
| Br | -0.23472 | 3.89265  | -0.27424 |
| C  | -2.89434 | -0.49388 | 0.41624  |
| C  | -4.08707 | -0.53139 | -0.31145 |
| N  | -2.75274 | -1.09267 | 1.59007  |
| C  | -5.1657  | -1.23754 | 0.20649  |
| C  | -3.78645 | -1.78153 | 2.08457  |
| C  | -5.01076 | -1.87933 | 1.43071  |
| H  | -6.09879 | -1.28648 | -0.33993 |
| H  | -3.628   | -2.26487 | 3.04259  |
| H  | -5.82584 | -2.44213 | 1.86763  |
| Cl | -4.23102 | 0.26273  | -1.86295 |
| O  | 0.06707  | -1.13177 | -3.00622 |
| H  | -0.79656 | -0.82897 | -3.31112 |

## Supplementary material

Amide bond between benzene and pyrazole of CLAP -  $\alpha$  side -TS2.xyz

|    | x        | y        | z        |
|----|----------|----------|----------|
| C  | 4.52641  | 1.43442  | -0.27953 |
| C  | 3.16604  | 1.37117  | -0.55874 |
| C  | 2.46208  | 0.12963  | -0.44904 |
| C  | 3.2163   | -1.03414 | -0.1054  |
| C  | 4.5813   | -0.93008 | 0.19688  |
| C  | 5.21774  | 0.29117  | 0.1176   |
| H  | 5.0488   | 2.3807   | -0.36067 |
| H  | 5.1202   | -1.82839 | 0.46609  |
| Cl | 6.94763  | 0.41162  | 0.50005  |
| C  | 2.44316  | 2.62296  | -0.99675 |
| H  | 1.60357  | 2.84839  | -0.33618 |
| H  | 3.12097  | 3.47831  | -0.9993  |
| H  | 2.04046  | 2.51782  | -2.01109 |
| C  | 2.68448  | -2.445   | -0.13968 |
| O  | 3.34229  | -3.39094 | 0.32929  |
| N  | 1.51172  | -2.63592 | -0.77116 |
| H  | 0.99007  | -1.77935 | -0.9871  |
| C  | 0.90145  | -3.94753 | -0.88312 |
| H  | 1.56241  | -4.64684 | -1.40151 |
| H  | 0.66837  | -4.37203 | 0.09936  |
| H  | -0.0229  | -3.85283 | -1.45226 |
| N  | 1.09632  | 0.04744  | -0.64748 |
| H  | 0.7491   | 0.90416  | -1.06765 |
| C  | 0.1294   | 0.19718  | 1.00326  |
| O  | 0.21672  | 1.38262  | 1.40078  |
| C  | -1.193   | -0.32294 | 0.49759  |
| C  | -1.74874 | -1.58844 | 0.55415  |
| N  | -2.12426 | 0.48196  | -0.09568 |
| C  | -3.01288 | -1.43483 | -0.04076 |
| H  | -1.30787 | -2.47727 | 0.96851  |
| N  | -3.25607 | -0.19884 | -0.4388  |
| Br | -4.32297 | -2.78366 | -0.29549 |
| C  | -2.06626 | 1.87702  | -0.40547 |
| C  | -2.76242 | 2.80711  | 0.37174  |
| N  | -1.37666 | 2.22037  | -1.48539 |
| C  | -2.73429 | 4.14596  | -0.00007 |
| C  | -1.33925 | 3.50985  | -1.83689 |
| C  | -2.00738 | 4.50473  | -1.12977 |
| H  | -3.26383 | 4.88564  | 0.58642  |
| H  | -0.75778 | 3.75045  | -2.72011 |
| H  | -1.95988 | 5.53694  | -1.45255 |
| Cl | -3.63325 | 2.32236  | 1.80799  |
| O  | 0.71999  | -0.81212 | 1.77511  |
| H  | 1.39359  | -0.36612 | 2.30563  |

## Supplementary material

Amide bond between benzene and pyrazole of CLAP -  $\beta$  side -TS1.xyz

|    | x        | y        | z        |
|----|----------|----------|----------|
| C  | -2.99185 | 1.22632  | 1.76812  |
| C  | -1.86544 | 0.39911  | 1.70367  |
| C  | -1.88662 | -0.72632 | 0.85397  |
| C  | -3.07478 | -1.04904 | 0.15793  |
| C  | -4.19512 | -0.21883 | 0.25182  |
| C  | -4.12954 | 0.92268  | 1.03674  |
| H  | -2.98378 | 2.09092  | 2.42054  |
| H  | -5.11442 | -0.47483 | -0.25824 |
| Cl | -5.5416  | 1.9769   | 1.1495   |
| C  | -0.68654 | 0.70766  | 2.59163  |
| H  | 0.06207  | 1.31269  | 2.07472  |
| H  | -1.01292 | 1.26208  | 3.47336  |
| H  | -0.19385 | -0.2114  | 2.91154  |
| C  | -3.19923 | -2.3425  | -0.60146 |
| O  | -2.74632 | -3.40148 | -0.1476  |
| N  | -3.89553 | -2.295   | -1.75604 |
| H  | -4.10564 | -1.39282 | -2.154   |
| C  | -4.10805 | -3.47653 | -2.58115 |
| H  | -4.79649 | -3.21823 | -3.38418 |
| H  | -3.17054 | -3.83558 | -3.01542 |
| H  | -4.5427  | -4.27883 | -1.98371 |
| N  | -0.76489 | -1.59256 | 0.79057  |
| H  | -1.05649 | -2.56402 | 0.73456  |
| C  | 0.41136  | -1.4487  | 0.01724  |
| O  | 1.22678  | -2.38495 | 0.06214  |
| C  | 0.90503  | -0.07026 | -0.31638 |
| C  | 0.27402  | 1.10992  | -0.67666 |
| N  | 2.25036  | 0.19612  | -0.34807 |
| C  | 1.32296  | 2.01107  | -0.9025  |
| H  | -0.77986 | 1.28232  | -0.79217 |
| N  | 2.51937  | 1.47948  | -0.71468 |
| Br | 1.16878  | 3.82637  | -1.43407 |
| C  | 3.37638  | -0.66677 | -0.14111 |
| C  | 3.87585  | -0.90701 | 1.14143  |
| N  | 3.96126  | -1.13882 | -1.23397 |
| C  | 5.00036  | -1.71056 | 1.28539  |
| C  | 5.04613  | -1.90727 | -1.09788 |
| C  | 5.59543  | -2.22765 | 0.1402   |
| H  | 5.39968  | -1.9179  | 2.26981  |
| H  | 5.49193  | -2.2767  | -2.01516 |
| H  | 6.47309  | -2.85779 | 0.20812  |
| Cl | 3.11602  | -0.21785 | 2.55808  |
| O  | -0.39159 | -1.53372 | -1.95557 |
| H  | -0.56952 | -2.48205 | -1.9488  |

## Supplementary material

Amide bond between benzene and pyrazole of CLAP -  $\beta$  side -TS2.xyz

|    | x        | y        | z        |
|----|----------|----------|----------|
| C  | -2.96246 | 1.52404  | 1.44158  |
| C  | -1.85123 | 0.68912  | 1.46661  |
| C  | -1.89913 | -0.60739 | 0.85815  |
| C  | -3.14555 | -1.00629 | 0.27269  |
| C  | -4.25522 | -0.14727 | 0.27688  |
| C  | -4.1505  | 1.1084   | 0.84327  |
| H  | -2.91528 | 2.49396  | 1.92332  |
| H  | -5.20127 | -0.47307 | -0.13731 |
| Cl | -5.55765 | 2.1888   | 0.85539  |
| C  | -0.63274 | 1.11787  | 2.24476  |
| H  | 0.27392  | 1.09907  | 1.64247  |
| H  | -0.76463 | 2.12674  | 2.64206  |
| H  | -0.46167 | 0.43622  | 3.08462  |
| C  | -3.31332 | -2.36766 | -0.32509 |
| O  | -2.79282 | -3.38355 | 0.16115  |
| N  | -4.09426 | -2.44931 | -1.43171 |
| H  | -4.37818 | -1.59796 | -1.88963 |
| C  | -4.36363 | -3.71452 | -2.1004  |
| H  | -5.08186 | -3.53664 | -2.89963 |
| H  | -3.45408 | -4.14495 | -2.52948 |
| H  | -4.78577 | -4.43587 | -1.39839 |
| N  | -0.76202 | -1.38499 | 0.87186  |
| H  | -1.03954 | -2.34907 | 0.70829  |
| C  | 0.36275  | -1.4533  | -0.72196 |
| O  | 1.05844  | -2.47573 | -0.54515 |
| C  | 0.99162  | -0.08982 | -0.72893 |
| C  | 0.47483  | 1.13993  | -1.09634 |
| N  | 2.28608  | 0.13152  | -0.34336 |
| C  | 1.53798  | 2.03404  | -0.88931 |
| H  | -0.52188 | 1.35306  | -1.43881 |
| N  | 2.63624  | 1.44661  | -0.44699 |
| Br | 1.51959  | 3.90979  | -1.17438 |
| C  | 3.34324  | -0.80969 | -0.11206 |
| C  | 3.73175  | -1.1615  | 1.1821   |
| N  | 3.97209  | -1.25678 | -1.19227 |
| C  | 4.7925   | -2.04596 | 1.34741  |
| C  | 4.99012  | -2.10669 | -1.03524 |
| C  | 5.43149  | -2.53407 | 0.21441  |
| H  | 5.10646  | -2.33908 | 2.34088  |
| H  | 5.47284  | -2.4529  | -1.94282 |
| H  | 6.26059  | -3.22488 | 0.30015  |
| Cl | 2.91824  | -0.51846 | 2.58887  |
| O  | -0.61047 | -1.46782 | -1.74314 |
| H  | -0.82828 | -2.40114 | -1.87182 |

## Supplementary material

Amide bond on benzene of CNAP -  $\alpha$  side -TS1.xyz

|    | x        | y        | z        |
|----|----------|----------|----------|
| C  | -3.97641 | 0.97841  | 1.37315  |
| C  | -2.80465 | 1.05236  | 2.138    |
| C  | -1.7408  | 0.18774  | 1.90061  |
| C  | -1.85673 | -0.73864 | 0.83981  |
| C  | -3.06394 | -0.87745 | 0.11959  |
| C  | -4.11084 | -0.00255 | 0.38565  |
| H  | -2.7349  | 1.77451  | 2.94253  |
| H  | -5.03906 | -0.12043 | -0.15424 |
| C  | -0.52972 | 0.24211  | 2.79758  |
| H  | -0.10202 | -0.75108 | 2.94591  |
| H  | 0.25671  | 0.87964  | 2.38561  |
| H  | -0.80387 | 0.64777  | 3.77265  |
| C  | -5.05549 | 1.87753  | 1.63557  |
| N  | -5.92748 | 2.60855  | 1.84618  |
| C  | -3.19959 | -1.97442 | -0.93939 |
| O  | -2.63057 | -3.08264 | -0.75874 |
| N  | -3.29889 | -1.45263 | -2.23239 |
| H  | -3.91578 | -0.65352 | -2.28855 |
| C  | -3.45906 | -2.38135 | -3.34566 |
| H  | -2.62155 | -3.0785  | -3.36612 |
| H  | -4.38969 | -2.95859 | -3.27785 |
| H  | -3.46233 | -1.8135  | -4.27716 |
| N  | -0.80453 | -1.64553 | 0.54657  |
| H  | -1.16788 | -2.56741 | 0.27873  |
| C  | 0.47731  | -1.44543 | 0.11992  |
| C  | 0.95952  | -0.07273 | -0.19324 |
| C  | 0.29446  | 1.09328  | -0.54031 |
| N  | 2.30092  | 0.19316  | -0.33609 |
| C  | 1.32094  | 1.99321  | -0.8647  |
| H  | -0.76567 | 1.26792  | -0.57141 |
| O  | 1.22643  | -2.40454 | -0.06879 |
| N  | 2.52652  | 1.46093  | -0.74417 |
| Br | 1.12415  | 3.78864  | -1.425   |
| C  | 3.43801  | -0.67502 | -0.20401 |
| C  | 3.96717  | -0.98921 | 1.04883  |
| N  | 3.97775  | -1.09508 | -1.33912 |
| C  | 5.08641  | -1.81229 | 1.11217  |
| C  | 5.05871  | -1.87744 | -1.27963 |
| C  | 5.64101  | -2.26961 | -0.07698 |
| H  | 5.5129   | -2.07763 | 2.07083  |
| H  | 5.47145  | -2.20087 | -2.22892 |
| H  | 6.51288  | -2.91117 | -0.07032 |
| Cl | 3.26022  | -0.36868 | 2.52159  |
| O  | -5.158   | -2.36512 | -0.51292 |
| H  | -5.12086 | -3.29054 | -0.77898 |

## Supplementary material

Amide bond on benzene of CNAP -  $\alpha$  side -TS2.xyz

|    | x        | y        | z        |
|----|----------|----------|----------|
| C  | -4.00585 | -0.627   | 1.76984  |
| C  | -2.74918 | -0.85816 | 2.34042  |
| C  | -1.66743 | -1.25731 | 1.5565   |
| C  | -1.84816 | -1.38372 | 0.16462  |
| C  | -3.12037 | -1.1518  | -0.42127 |
| C  | -4.19169 | -0.79487 | 0.39547  |
| H  | -2.62232 | -0.76494 | 3.41193  |
| H  | -5.17061 | -0.64355 | -0.03752 |
| C  | -0.36506 | -1.59023 | 2.2364   |
| H  | 0.12727  | -2.4417  | 1.7622   |
| H  | 0.33266  | -0.75079 | 2.20862  |
| H  | -0.54008 | -1.83803 | 3.28425  |
| C  | -5.10817 | -0.25171 | 2.59751  |
| N  | -5.99967 | 0.05433  | 3.26864  |
| C  | -3.36168 | -1.38758 | -1.87624 |
| O  | -2.72244 | -2.20175 | -2.52847 |
| N  | -2.632   | 1.0993   | -1.95656 |
| H  | -3.45653 | 1.65919  | -1.70591 |
| C  | -2.35466 | 1.32082  | -3.36871 |
| H  | -1.38344 | 0.87362  | -3.62608 |
| H  | -3.08614 | 0.86965  | -4.07543 |
| H  | -2.28454 | 2.38566  | -3.66466 |
| N  | -0.80107 | -1.85252 | -0.66388 |
| H  | -1.11037 | -2.5056  | -1.3798  |
| C  | 0.49597  | -1.44194 | -0.8484  |
| C  | 0.87616  | -0.07885 | -0.40653 |
| C  | 0.0957   | 1.06242  | -0.32652 |
| N  | 2.17339  | 0.29506  | -0.13417 |
| C  | 1.01972  | 2.06473  | 0.01196  |
| H  | -0.9546  | 1.15364  | -0.62214 |
| O  | 1.29496  | -2.15796 | -1.44965 |
| N  | 2.26177  | 1.61939  | 0.12954  |
| Br | 0.65138  | 3.90323  | 0.2927   |
| C  | 3.39982  | -0.43528 | -0.28945 |
| C  | 3.9947   | -1.09576 | 0.78624  |
| N  | 3.95437  | -0.38401 | -1.49425 |
| C  | 5.19756  | -1.76567 | 0.57756  |
| C  | 5.11037  | -1.01973 | -1.69386 |
| C  | 5.7633   | -1.73211 | -0.68969 |
| H  | 5.67622  | -2.28996 | 1.39448  |
| H  | 5.53044  | -0.9543  | -2.69162 |
| H  | 6.69771  | -2.23969 | -0.89255 |
| Cl | 3.28389  | -1.07704 | 2.38193  |
| O  | -4.53107 | -0.90798 | -2.40186 |
| H  | -4.49551 | 0.04664  | -2.20379 |

## Supplementary material

Amide bond on benzene of CNAP -  $\alpha$  side -TS2-H.xyz

|    | x        | y        | z        |
|----|----------|----------|----------|
| C  | -4.20758 | 0.52772  | 1.3782   |
| C  | -3.04739 | 0.6835   | 2.14358  |
| C  | -1.90691 | -0.07647 | 1.88111  |
| C  | -1.93844 | -0.97768 | 0.79915  |
| C  | -3.12932 | -1.19325 | 0.05927  |
| C  | -4.25203 | -0.42584 | 0.35362  |
| H  | -3.03986 | 1.38448  | 2.96936  |
| H  | -5.15784 | -0.58248 | -0.21472 |
| C  | -0.71026 | 0.06241  | 2.78799  |
| H  | -0.17559 | -0.88377 | 2.88743  |
| H  | 0.00074  | 0.80385  | 2.41504  |
| H  | -1.02892 | 0.38262  | 3.78123  |
| C  | -5.36392 | 1.31549  | 1.66816  |
| N  | -6.30016 | 1.95406  | 1.90191  |
| C  | -3.23019 | -2.28853 | -0.97466 |
| O  | -2.57594 | -3.33819 | -0.83447 |
| N  | -2.5509  | -1.0571  | -2.67251 |
| H  | -2.26517 | -0.10603 | -2.4446  |
| C  | -1.49903 | -1.71194 | -3.42959 |
| H  | -0.49872 | -1.62514 | -2.97221 |
| H  | -1.7191  | -2.78406 | -3.50624 |
| H  | -1.40059 | -1.34054 | -4.46459 |
| N  | -0.82065 | -1.78343 | 0.4739   |
| H  | -1.10962 | -2.71436 | 0.15349  |
| C  | 0.45705  | -1.47453 | 0.09814  |
| C  | 0.85153  | -0.05933 | -0.13736 |
| C  | 0.11531  | 1.07427  | -0.44548 |
| N  | 2.17414  | 0.30381  | -0.23428 |
| C  | 1.08342  | 2.05652  | -0.70238 |
| H  | -0.95336 | 1.17891  | -0.49088 |
| O  | 1.27438  | -2.37047 | -0.11352 |
| N  | 2.32002  | 1.60225  | -0.57712 |
| Br | 0.77443  | 3.85939  | -1.18236 |
| C  | 3.36786  | -0.48632 | -0.11157 |
| C  | 3.88397  | -0.83012 | 1.13903  |
| N  | 3.97134  | -0.79829 | -1.24941 |
| C  | 5.06366  | -1.56455 | 1.1941   |
| C  | 5.1099   | -1.49496 | -1.19716 |
| C  | 5.6878   | -1.90713 | 0.00082  |
| H  | 5.48248  | -1.8497  | 2.15046  |
| H  | 5.57388  | -1.73055 | -2.14861 |
| H  | 6.6085   | -2.47642 | 0.00144  |
| Cl | 3.08768  | -0.35373 | 2.61976  |
| O  | -4.3851  | -2.28986 | -1.72041 |
| H  | -3.98824 | -1.65877 | -2.44993 |

## Supplementary material

Amide bond on benzene of CNAP -  $\beta$  side -TS1.xyz

|    | x        | y        | z        |
|----|----------|----------|----------|
| C  | -4.03208 | 1.06316  | 1.37838  |
| C  | -2.83126 | 1.17764  | 2.08298  |
| C  | -1.76714 | 0.31282  | 1.8273   |
| C  | -1.9108  | -0.64082 | 0.8      |
| C  | -3.1435  | -0.80777 | 0.11724  |
| C  | -4.19402 | 0.04873  | 0.42468  |
| H  | -2.73576 | 1.92256  | 2.86366  |
| H  | -5.15213 | -0.07619 | -0.05953 |
| C  | -0.53686 | 0.39758  | 2.69586  |
| H  | -0.06418 | -0.57874 | 2.81437  |
| H  | 0.21132  | 1.07793  | 2.28154  |
| H  | -0.80554 | 0.76914  | 3.68612  |
| C  | -5.11574 | 1.94801  | 1.66695  |
| N  | -5.99309 | 2.66618  | 1.89877  |
| C  | -3.3537  | -1.98541 | -0.82947 |
| O  | -2.79082 | -3.07811 | -0.55488 |
| N  | -4.59668 | -2.00253 | -1.47034 |
| H  | -4.77033 | -1.13664 | -1.96394 |
| C  | -4.90943 | -3.16993 | -2.28954 |
| H  | -4.17872 | -3.33609 | -3.08964 |
| H  | -4.94377 | -4.06316 | -1.66588 |
| H  | -5.89445 | -3.02208 | -2.73537 |
| N  | -0.88248 | -1.56614 | 0.50057  |
| H  | -1.28201 | -2.48095 | 0.24263  |
| C  | 0.41635  | -1.41549 | 0.10821  |
| C  | 0.95711  | -0.06605 | -0.20986 |
| C  | 0.34216  | 1.12268  | -0.57116 |
| N  | 2.30953  | 0.14639  | -0.33924 |
| C  | 1.40615  | 1.98001  | -0.88866 |
| H  | -0.7103  | 1.33624  | -0.6151  |
| O  | 1.13312  | -2.40418 | -0.056   |
| N  | 2.58886  | 1.40186  | -0.75197 |
| Br | 1.28675  | 3.77897  | -1.45971 |
| C  | 3.41106  | -0.76338 | -0.18815 |
| C  | 3.91576  | -1.08546 | 1.07279  |
| N  | 3.94559  | -1.21425 | -1.31389 |
| C  | 5.00233  | -1.94952 | 1.15503  |
| C  | 4.99519  | -2.03671 | -1.23623 |
| C  | 5.55058  | -2.43895 | -0.02424 |
| H  | 5.4092   | -2.22136 | 2.12037  |
| H  | 5.40456  | -2.38466 | -2.17828 |
| H  | 6.39754  | -3.11278 | -0.00293 |
| Cl | 3.21854  | -0.42431 | 2.5325   |
| O  | -2.3471  | -1.09583 | -2.34887 |
| H  | -1.41352 | -1.28614 | -2.20278 |

## Supplementary material

Amide bond on benzene of CNAP -  $\beta$  side -TS2.xyz

|    | x        | y        | z        |
|----|----------|----------|----------|
| C  | -3.81441 | 1.4234   | 1.03905  |
| C  | -2.69141 | 1.23409  | 1.85539  |
| C  | -1.74216 | 0.26328  | 1.54984  |
| C  | -1.91623 | -0.50672 | 0.37748  |
| C  | -3.11993 | -0.42328 | -0.3731  |
| C  | -4.03383 | 0.58098  | -0.05251 |
| H  | -2.56475 | 1.84102  | 2.74357  |
| H  | -4.92361 | 0.6894   | -0.65527 |
| C  | -0.59302 | 0.04326  | 2.5022   |
| H  | -0.28715 | -1.00424 | 2.52069  |
| H  | 0.28358  | 0.63772  | 2.23477  |
| H  | -0.88928 | 0.3311   | 3.51221  |
| C  | -4.75578 | 2.45282  | 1.34722  |
| N  | -5.51622 | 3.28859  | 1.59692  |
| C  | -3.45962 | -1.39588 | -1.47872 |
| O  | -2.64281 | -2.23726 | -1.88528 |
| N  | -5.10635 | -2.39257 | -0.3371  |
| H  | -5.19768 | -2.05962 | 0.62165  |
| C  | -4.91883 | -3.83108 | -0.3264  |
| H  | -4.02189 | -4.15611 | 0.23363  |
| H  | -5.76915 | -4.38938 | 0.10234  |
| H  | -4.79519 | -4.19663 | -1.35266 |
| N  | -0.95408 | -1.46696 | -0.01032 |
| H  | -1.37649 | -2.23559 | -0.54216 |
| C  | 0.38536  | -1.36315 | -0.28469 |
| C  | 1.04865  | -0.03316 | -0.3327  |
| C  | 0.55498  | 1.24086  | -0.56678 |
| N  | 2.41898  | 0.08263  | -0.31183 |
| C  | 1.70179  | 2.04366  | -0.66158 |
| H  | -0.47104 | 1.5456   | -0.66788 |
| O  | 1.03218  | -2.36883 | -0.57537 |
| N  | 2.82257  | 1.35646  | -0.50983 |
| Br | 1.76334  | 3.90827  | -0.96968 |
| C  | 3.43446  | -0.92997 | -0.2233  |
| C  | 3.79338  | -1.49238 | 1.00265  |
| N  | 4.03961  | -1.23937 | -1.36128 |
| C  | 4.80358  | -2.44815 | 1.02745  |
| C  | 5.01649  | -2.14978 | -1.3369  |
| C  | 5.42538  | -2.78676 | -0.1679  |
| H  | 5.09666  | -2.90481 | 1.9639   |
| H  | 5.48712  | -2.3761  | -2.28734 |
| H  | 6.21694  | -3.52482 | -0.19045 |
| Cl | 3.01135  | -1.01778 | 2.49117  |
| O  | -4.52877 | -1.0337  | -2.26821 |
| H  | -5.22734 | -1.50031 | -1.66342 |

## Supplementary material

Amide bond between benzene and pyrazole of CNAP -  $\alpha$  side -TS1.xyz

|    | x        | y        | z        |
|----|----------|----------|----------|
| C  | 4.59353  | -0.35527 | 0.13532  |
| C  | 4.3979   | -1.05959 | -1.05995 |
| C  | 3.18083  | -1.67105 | -1.34321 |
| C  | 2.12801  | -1.57751 | -0.40065 |
| C  | 2.34448  | -0.91973 | 0.83226  |
| C  | 3.563    | -0.29371 | 1.08039  |
| H  | 5.20136  | -1.11277 | -1.78486 |
| H  | 3.73077  | 0.20708  | 2.02549  |
| C  | 2.98203  | -2.40171 | -2.64608 |
| H  | 2.90826  | -3.48413 | -2.48551 |
| H  | 2.05671  | -2.0728  | -3.12815 |
| H  | 3.82684  | -2.23055 | -3.31459 |
| C  | 5.84436  | 0.28016  | 0.39746  |
| N  | 6.85832  | 0.79676  | 0.60838  |
| C  | 1.36073  | -0.99458 | 1.98029  |
| O  | 0.96502  | -2.07469 | 2.42168  |
| N  | 1.02931  | 0.18732  | 2.54132  |
| H  | 1.30759  | 1.03819  | 2.07712  |
| C  | 0.17367  | 0.28195  | 3.71895  |
| H  | -0.8378  | -0.06573 | 3.49628  |
| H  | 0.58243  | -0.31922 | 4.53345  |
| H  | 0.13547  | 1.32405  | 4.03258  |
| N  | 0.9019   | -2.20214 | -0.67901 |
| H  | 0.9793   | -3.0204  | -1.26849 |
| C  | -0.3705  | -1.61644 | -0.89656 |
| C  | -0.54031 | -0.15465 | -0.59814 |
| C  | 0.24236  | 0.96673  | -0.82873 |
| N  | -1.69215 | 0.30237  | -0.01149 |
| C  | -0.52841 | 2.03297  | -0.34805 |
| H  | 1.2014   | 1.00849  | -1.31158 |
| O  | -1.3634  | -2.35254 | -0.89891 |
| N  | -1.69628 | 1.65178  | 0.14681  |
| Br | -0.06359 | 3.87187  | -0.36285 |
| C  | -2.84235 | -0.41866 | 0.44991  |
| C  | -3.99296 | -0.49426 | -0.33965 |
| N  | -2.77441 | -0.93092 | 1.66981  |
| C  | -5.10937 | -1.14868 | 0.16562  |
| C  | -3.84551 | -1.56829 | 2.15419  |
| C  | -5.0324  | -1.70064 | 1.44008  |
| H  | -6.01135 | -1.22636 | -0.42766 |
| H  | -3.74882 | -1.98075 | 3.15268  |
| H  | -5.87917 | -2.22047 | 1.86989  |
| Cl | -4.03615 | 0.19093  | -1.94753 |
| O  | -0.0252  | -1.24858 | -2.98505 |
| H  | -0.90546 | -0.95771 | -3.25211 |

## Supplementary material

Amide bond between benzene and pyrazole of CNAP -  $\alpha$  side -TS2.xyz

|    | x        | y        | z        |
|----|----------|----------|----------|
| C  | 5.34194  | 0.55451  | -0.16826 |
| C  | 4.60764  | 1.6889   | -0.5761  |
| C  | 3.23741  | 1.6485   | -0.73086 |
| C  | 2.50442  | 0.43048  | -0.47187 |
| C  | 3.27632  | -0.73575 | -0.12873 |
| C  | 4.65292  | -0.64983 | 0.03753  |
| H  | 5.13537  | 2.61813  | -0.7623  |
| H  | 5.21504  | -1.54198 | 0.287    |
| C  | 2.50009  | 2.88935  | -1.17146 |
| H  | 1.96269  | 2.72668  | -2.11269 |
| H  | 1.75978  | 3.20798  | -0.4315  |
| H  | 3.19623  | 3.71516  | -1.32604 |
| C  | 6.74786  | 0.62168  | -0.00116 |
| N  | 7.89945  | 0.67997  | 0.1376   |
| C  | 2.68389  | -2.11957 | -0.10939 |
| O  | 2.0173   | -2.57013 | -1.04559 |
| N  | 3.03694  | -2.89476 | 0.94677  |
| H  | 3.4413   | -2.44451 | 1.75258  |
| C  | 2.58872  | -4.2724  | 1.0825   |
| H  | 1.50566  | -4.33458 | 1.22792  |
| H  | 2.84768  | -4.84491 | 0.1903   |
| H  | 3.08709  | -4.71668 | 1.94336  |
| N  | 1.15552  | 0.39046  | -0.54922 |
| H  | 0.78236  | 1.28604  | -0.84751 |
| C  | 0.11334  | 0.19677  | 1.03444  |
| C  | -1.12863 | -0.3787  | 0.39957  |
| C  | -1.55924 | -1.68631 | 0.26982  |
| N  | -2.11498 | 0.40793  | -0.12539 |
| C  | -2.81181 | -1.57369 | -0.3575  |
| H  | -1.04416 | -2.57752 | 0.58128  |
| O  | 0.06206  | 1.32943  | 1.56442  |
| N  | -3.16249 | -0.32375 | -0.60321 |
| Br | -3.97138 | -2.99353 | -0.84588 |
| C  | -2.18987 | 1.83209  | -0.23458 |
| C  | -3.01659 | 2.56654  | 0.62067  |
| N  | -1.48768 | 2.39561  | -1.20871 |
| C  | -3.11039 | 3.9419   | 0.44424  |
| C  | -1.56711 | 3.72047  | -1.37044 |
| C  | -2.36975 | 4.53157  | -0.57403 |
| H  | -3.74224 | 4.53255  | 1.09493  |
| H  | -0.97067 | 4.14344  | -2.17135 |
| H  | -2.4139  | 5.59989  | -0.74329 |
| Cl | -3.89794 | 1.79649  | 1.91949  |
| O  | 0.77704  | -0.83122 | 1.70598  |
| H  | 1.35539  | -0.3887  | 2.34189  |

## Supplementary material

Amide bond between benzene and pyrazole of CNAP -  $\beta$  side -TS1.xyz

|    | x        | y        | z        |
|----|----------|----------|----------|
| C  | -4.16837 | 1.0216   | 1.16732  |
| C  | -2.97931 | 1.26831  | 1.86286  |
| C  | -1.88043 | 0.42046  | 1.74347  |
| C  | -1.96482 | -0.68975 | 0.87168  |
| C  | -3.18638 | -0.96857 | 0.20681  |
| C  | -4.27414 | -0.1136  | 0.35648  |
| H  | -2.92327 | 2.11605  | 2.53527  |
| H  | -5.21327 | -0.3343  | -0.13442 |
| C  | -0.66638 | 0.67095  | 2.60078  |
| H  | -0.19296 | -0.27043 | 2.8827   |
| H  | 0.08386  | 1.26747  | 2.07741  |
| H  | -0.9501  | 1.21039  | 3.50613  |
| C  | -5.28394 | 1.90003  | 1.31899  |
| N  | -6.18614 | 2.61434  | 1.4395   |
| C  | -3.35954 | -2.23618 | -0.58696 |
| O  | -2.915   | -3.31608 | -0.17594 |
| N  | -4.08016 | -2.13871 | -1.72182 |
| H  | -4.28648 | -1.22132 | -2.08581 |
| C  | -4.34274 | -3.29168 | -2.57337 |
| H  | -4.77088 | -4.10307 | -1.98376 |
| H  | -5.05337 | -2.99752 | -3.34392 |
| H  | -3.42691 | -3.65316 | -3.04955 |
| N  | -0.88434 | -1.58706 | 0.75401  |
| H  | -1.21563 | -2.54006 | 0.62806  |
| C  | 0.31955  | -1.44289 | 0.01845  |
| C  | 0.82691  | -0.07197 | -0.31373 |
| C  | 0.20712  | 1.11436  | -0.67316 |
| N  | 2.17545  | 0.18062  | -0.34634 |
| C  | 1.26469  | 2.00525  | -0.89894 |
| H  | -0.84476 | 1.29798  | -0.78969 |
| O  | 1.11544  | -2.39084 | 0.05889  |
| N  | 2.45564  | 1.46067  | -0.71255 |
| Br | 1.12842  | 3.8218   | -1.42851 |
| C  | 3.29348  | -0.69662 | -0.15268 |
| C  | 3.80461  | -0.94507 | 1.12341  |
| N  | 3.85743  | -1.17632 | -1.25311 |
| C  | 4.91962  | -1.76465 | 1.25259  |
| C  | 4.93288  | -1.95995 | -1.13125 |
| C  | 5.49309  | -2.28879 | 0.09988  |
| H  | 5.32807  | -1.97852 | 2.23184  |
| H  | 5.36186  | -2.33498 | -2.05422 |
| H  | 6.36267  | -2.93113 | 0.15651  |
| Cl | 3.07259  | -0.24709 | 2.54992  |
| O  | -0.4987  | -1.5059  | -1.98506 |
| H  | -0.70179 | -2.44927 | -1.98381 |

## Supplementary material

Amide bond between benzene and pyrazole of CNAP -  $\beta$  side -TS2.xyz

|    | x        | y        | z        |
|----|----------|----------|----------|
| C  | -4.19456 | 1.27225  | 0.91833  |
| C  | -2.96212 | 1.61601  | 1.50675  |
| C  | -1.88311 | 0.74867  | 1.49137  |
| C  | -1.99306 | -0.52536 | 0.84448  |
| C  | -3.2659  | -0.87575 | 0.28127  |
| C  | -4.33536 | 0.01372  | 0.32333  |
| H  | -2.87035 | 2.56902  | 2.01572  |
| H  | -5.29589 | -0.2717  | -0.08848 |
| C  | -0.64157 | 1.10367  | 2.2705   |
| H  | -0.47924 | 0.37376  | 3.06989  |
| H  | 0.25684  | 1.09621  | 1.65653  |
| H  | -0.74334 | 2.09269  | 2.72204  |
| C  | -5.29247 | 2.17489  | 0.962    |
| N  | -6.18554 | 2.91364  | 0.99639  |
| C  | -3.48726 | -2.22839 | -0.32846 |
| O  | -3.03405 | -3.26531 | 0.1765   |
| N  | -4.23762 | -2.26284 | -1.4545  |
| H  | -4.46838 | -1.39455 | -1.91098 |
| C  | -4.55635 | -3.50901 | -2.13839 |
| H  | -5.05893 | -4.20066 | -1.45985 |
| H  | -5.22065 | -3.28488 | -2.97158 |
| H  | -3.65552 | -3.99598 | -2.52204 |
| N  | -0.89197 | -1.35125 | 0.80552  |
| H  | -1.21479 | -2.30269 | 0.64757  |
| C  | 0.19005  | -1.38725 | -0.68958 |
| C  | 0.89163  | -0.05021 | -0.69199 |
| C  | 0.43998  | 1.20866  | -1.04541 |
| N  | 2.20351  | 0.09522  | -0.3315  |
| C  | 1.55646  | 2.03992  | -0.85661 |
| H  | -0.54761 | 1.48072  | -1.37282 |
| O  | 0.86796  | -2.43841 | -0.57367 |
| N  | 2.6272   | 1.38799  | -0.43822 |
| Br | 1.64271  | 3.91455  | -1.13741 |
| C  | 3.21082  | -0.90386 | -0.11803 |
| C  | 3.57803  | -1.30053 | 1.16918  |
| N  | 3.82233  | -1.3561  | -1.20566 |
| C  | 4.5931   | -2.23947 | 1.31869  |
| C  | 4.79789  | -2.25705 | -1.06407 |
| C  | 5.2119   | -2.73375 | 0.1771   |
| H  | 4.88881  | -2.56835 | 2.30658  |
| H  | 5.2681   | -2.6053  | -1.97743 |
| H  | 6.00591  | -3.46602 | 0.25018  |
| Cl | 2.79465  | -0.64333 | 2.58662  |
| O  | -0.76269 | -1.33648 | -1.74838 |
| H  | -0.95268 | -2.26251 | -1.95109 |

## Supplementary material

C-Br bond on pyrazole of CLAP -  $\alpha$  side -TS.xyz

|    | x        | y        | z        |
|----|----------|----------|----------|
| C  | -4.25858 | -0.15315 | 1.4546   |
| C  | -3.05465 | -0.62907 | 1.98208  |
| C  | -2.12583 | -1.23162 | 1.1149   |
| C  | -2.41298 | -1.37606 | -0.25144 |
| C  | -3.61027 | -0.87219 | -0.7657  |
| C  | -4.51598 | -0.2684  | 0.09582  |
| H  | -4.98517 | 0.31478  | 2.10679  |
| H  | -3.84439 | -0.98025 | -1.81658 |
| Cl | -6.03342 | 0.35122  | -0.54972 |
| C  | -2.76935 | -0.49167 | 3.45617  |
| H  | -1.81219 | 0.00495  | 3.63187  |
| H  | -3.55318 | 0.0846   | 3.94804  |
| H  | -2.71715 | -1.47094 | 3.94217  |
| C  | -1.50843 | -2.15391 | -1.17952 |
| O  | -1.17277 | -3.31221 | -0.92838 |
| N  | -1.16179 | -1.51519 | -2.31566 |
| H  | -1.39193 | -0.53777 | -2.4101  |
| C  | -0.3459  | -2.14154 | -3.34902 |
| H  | -0.3483  | -1.49792 | -4.22721 |
| H  | 0.68279  | -2.28013 | -3.0077  |
| H  | -0.76197 | -3.11359 | -3.61779 |
| N  | -0.9042  | -1.72224 | 1.668    |
| H  | -0.97196 | -2.51947 | 2.28986  |
| C  | 0.37922  | -1.26821 | 1.54006  |
| O  | 1.30451  | -1.87373 | 2.08378  |
| C  | 0.63283  | -0.01953 | 0.78015  |
| C  | -0.13071 | 1.10862  | 0.60289  |
| N  | 1.89587  | 0.26264  | 0.29589  |
| C  | 0.75703  | 2.07092  | 0.02034  |
| H  | -1.13486 | 1.29205  | 0.94008  |
| N  | 1.92622  | 1.52465  | -0.28835 |
| Br | 0.09039  | 3.42679  | -1.30595 |
| C  | 2.90082  | -0.65932 | -0.07747 |
| C  | 4.23839  | -0.4577  | 0.29446  |
| N  | 2.5285   | -1.70921 | -0.80707 |
| C  | 5.20307  | -1.36304 | -0.12844 |
| C  | 3.4526   | -2.59671 | -1.18595 |
| C  | 4.80397  | -2.45896 | -0.88689 |
| H  | 6.23967  | -1.22003 | 0.14881  |
| H  | 3.09633  | -3.44279 | -1.76449 |
| H  | 5.525    | -3.18999 | -1.22975 |
| Cl | 4.71394  | 0.87213  | 1.33069  |
| O  | 0.92608  | 3.36893  | 1.521    |
| H  | 0.97847  | 4.24258  | 1.11465  |

## Supplementary material

C-Br bond on pyrazole of CLAP -  $\beta$  side -TS.xyz

|    | x        | y        | z        |
|----|----------|----------|----------|
| C  | -4.33657 | -0.38202 | 1.37804  |
| C  | -3.14712 | -0.89766 | 1.90034  |
| C  | -2.14758 | -1.33597 | 1.01181  |
| C  | -2.34768 | -1.27166 | -0.37596 |
| C  | -3.52768 | -0.71985 | -0.87906 |
| C  | -4.50677 | -0.28687 | 0.00426  |
| H  | -5.11586 | -0.04061 | 2.04755  |
| H  | -3.6841  | -0.6552  | -1.94781 |
| Cl | -6.00321 | 0.39321  | -0.63493 |
| C  | -2.94749 | -0.96526 | 3.39384  |
| H  | -2.0188  | -0.4724  | 3.69239  |
| H  | -3.77556 | -0.48447 | 3.91508  |
| H  | -2.89039 | -2.00091 | 3.74466  |
| C  | -1.3862  | -1.87999 | -1.37509 |
| O  | -1.21515 | -3.10675 | -1.39177 |
| N  | -0.83917 | -1.03332 | -2.25857 |
| H  | -0.8496  | -0.00894 | -2.09594 |
| C  | 0.033    | -1.52338 | -3.31858 |
| H  | 0.27731  | -0.6872  | -3.97272 |
| H  | 0.95814  | -1.94136 | -2.91242 |
| H  | -0.47063 | -2.29649 | -3.90283 |
| N  | -0.93938 | -1.85506 | 1.57183  |
| H  | -1.03875 | -2.62567 | 2.22249  |
| C  | 0.33802  | -1.35811 | 1.54932  |
| O  | 1.23718  | -1.92655 | 2.16832  |
| C  | 0.5925   | -0.12578 | 0.76585  |
| C  | -0.19349 | 0.98059  | 0.55903  |
| N  | 1.80177  | 0.11309  | 0.15398  |
| C  | 0.56536  | 1.81604  | -0.32129 |
| H  | -1.18689 | 1.16726  | 0.92416  |
| N  | 1.79305  | 1.34206  | -0.5021  |
| Br | 0.42942  | 3.85313  | -0.11799 |
| C  | 2.88379  | -0.76695 | -0.06046 |
| C  | 4.19416  | -0.4105  | 0.29671  |
| N  | 2.61086  | -1.9409  | -0.62748 |
| C  | 5.23448  | -1.28769 | 0.01757  |
| C  | 3.60786  | -2.79802 | -0.86201 |
| C  | 4.9386   | -2.50961 | -0.57769 |
| H  | 6.25037  | -1.02463 | 0.28346  |
| H  | 3.32928  | -3.74636 | -1.30995 |
| H  | 5.72166  | -3.2217  | -0.80476 |
| Cl | 4.54767  | 1.07719  | 1.15205  |
| O  | -0.37432 | 1.74567  | -1.9764  |
| H  | -1.04661 | 2.43844  | -1.94969 |

## Supplementary material

C-Cl bond on benzene of CLAP -  $\alpha$  side -TS.xyz

|    | x        | y        | z        |
|----|----------|----------|----------|
| C  | -3.90872 | 0.18525  | 1.45669  |
| C  | -2.70845 | -0.29961 | 1.96418  |
| C  | -1.87343 | -1.08195 | 1.14289  |
| C  | -2.25529 | -1.34846 | -0.18541 |
| C  | -3.44984 | -0.84426 | -0.6902  |
| C  | -4.34971 | -0.17039 | 0.16404  |
| H  | -4.5463  | 0.79985  | 2.0801   |
| H  | -3.74287 | -1.04881 | -1.71158 |
| Cl | -5.45608 | 1.04854  | -0.66012 |
| C  | -2.30238 | 0.03584  | 3.38046  |
| H  | -1.32224 | 0.51943  | 3.41866  |
| H  | -3.03072 | 0.70413  | 3.84206  |
| H  | -2.23506 | -0.86587 | 3.99738  |
| C  | -1.40844 | -2.21556 | -1.08032 |
| O  | -1.01048 | -3.33169 | -0.73236 |
| N  | -1.14371 | -1.70473 | -2.30366 |
| H  | -1.44166 | -0.76318 | -2.50588 |
| C  | -0.39012 | -2.43529 | -3.31387 |
| H  | -0.38297 | -1.84786 | -4.23073 |
| H  | 0.64053  | -2.6043  | -2.9916  |
| H  | -0.8545  | -3.40288 | -3.51553 |
| N  | -0.62928 | -1.56344 | 1.66964  |
| H  | -0.654   | -2.39042 | 2.25606  |
| C  | 0.63469  | -1.14688 | 1.42136  |
| O  | 1.61619  | -1.74615 | 1.86912  |
| C  | 0.83809  | 0.08822  | 0.60746  |
| C  | 0.06913  | 1.22373  | 0.40495  |
| N  | 2.04366  | 0.32701  | -0.00372 |
| C  | 0.90153  | 2.07403  | -0.3409  |
| H  | -0.9313  | 1.41666  | 0.74848  |
| N  | 2.08297  | 1.53918  | -0.60263 |
| Br | 0.48596  | 3.81254  | -0.96202 |
| C  | 3.15381  | -0.55884 | -0.1981  |
| C  | 4.3554   | -0.35502 | 0.48377  |
| N  | 2.98183  | -1.52935 | -1.0836  |
| C  | 5.42065  | -1.2094  | 0.22337  |
| C  | 4.00161  | -2.35947 | -1.32392 |
| C  | 5.23919  | -2.23362 | -0.69925 |
| H  | 6.36302  | -1.07719 | 0.73898  |
| H  | 3.82089  | -3.14678 | -2.04742 |
| H  | 6.04343  | -2.92149 | -0.92694 |
| Cl | 4.52645  | 0.91619  | 1.67032  |
| O  | -5.79138 | -1.50288 | 0.48812  |
| H  | -6.60007 | -1.13541 | 0.1106   |

## Supplementary material

C-Cl bond on benzene of CLAP -  $\beta$  side -TS.xyz

|    | x        | y        | z        |
|----|----------|----------|----------|
| C  | -3.89783 | 0.25013  | 1.48418  |
| C  | -2.67952 | -0.18781 | 1.99232  |
| C  | -1.86033 | -1.02145 | 1.20715  |
| C  | -2.31288 | -1.4521  | -0.05451 |
| C  | -3.52807 | -1.00076 | -0.55861 |
| C  | -4.28665 | -0.05257 | 0.16154  |
| H  | -4.54055 | 0.87373  | 2.09317  |
| H  | -3.8932  | -1.35956 | -1.51193 |
| Cl | -6.10143 | -0.11403 | -0.1325  |
| C  | -2.2567  | 0.21906  | 3.38501  |
| H  | -1.32505 | 0.79268  | 3.37123  |
| H  | -3.0241  | 0.83522  | 3.85575  |
| H  | -2.08238 | -0.65304 | 4.02212  |
| C  | -1.54456 | -2.47869 | -0.84532 |
| O  | -1.15223 | -3.5394  | -0.34891 |
| N  | -1.3426  | -2.17394 | -2.14678 |
| H  | -1.63183 | -1.26684 | -2.47834 |
| C  | -0.67352 | -3.0801  | -3.07012 |
| H  | -0.68302 | -2.6316  | -4.0622  |
| H  | 0.36238  | -3.25668 | -2.76996 |
| H  | -1.19006 | -4.04162 | -3.1097  |
| N  | -0.60906 | -1.47984 | 1.73906  |
| H  | -0.62337 | -2.29663 | 2.34006  |
| C  | 0.651    | -1.07104 | 1.46057  |
| O  | 1.63799  | -1.65146 | 1.92146  |
| C  | 0.84652  | 0.12959  | 0.59517  |
| C  | 0.07941  | 1.25891  | 0.35618  |
| N  | 2.04677  | 0.33982  | -0.03722 |
| C  | 0.90734  | 2.07694  | -0.43023 |
| H  | -0.916   | 1.46887  | 0.70331  |
| N  | 2.08398  | 1.52778  | -0.68294 |
| Br | 0.49458  | 3.79318  | -1.11193 |
| C  | 3.15003  | -0.55804 | -0.21279 |
| C  | 4.36412  | -0.33026 | 0.4388   |
| N  | 2.95997  | -1.56406 | -1.05396 |
| C  | 5.42288  | -1.19725 | 0.19417  |
| C  | 3.97357  | -2.40624 | -1.27824 |
| C  | 5.22268  | -2.25791 | -0.68223 |
| H  | 6.37476  | -1.04652 | 0.68671  |
| H  | 3.77814  | -3.22212 | -1.9653  |
| H  | 6.02145  | -2.95637 | -0.89651 |
| Cl | 4.55878  | 0.98703  | 1.57016  |
| O  | -4.01908 | 1.64755  | -0.8479  |
| H  | -4.88401 | 1.91375  | -1.18367 |

## Supplementary material

C-Cl bond on pyridine of CLAP -  $\alpha$  side -TS.xyz

|    | x        | y        | z        |
|----|----------|----------|----------|
| C  | -4.44455 | -0.05458 | 1.33217  |
| C  | -3.25517 | -0.51595 | 1.90309  |
| C  | -2.29615 | -1.12233 | 1.07189  |
| C  | -2.54017 | -1.28825 | -0.30059 |
| C  | -3.7236  | -0.79721 | -0.85759 |
| C  | -4.6587  | -0.18735 | -0.03267 |
| H  | -5.19392 | 0.41659  | 1.95549  |
| H  | -3.92511 | -0.92165 | -1.9134  |
| Cl | -6.15799 | 0.41583  | -0.73241 |
| C  | -3.01748 | -0.36079 | 3.38393  |
| H  | -2.07029 | 0.14521  | 3.58607  |
| H  | -3.82134 | 0.21326  | 3.84495  |
| H  | -2.97324 | -1.33469 | 3.88151  |
| C  | -1.60545 | -2.07934 | -1.18729 |
| O  | -1.27116 | -3.22956 | -0.89999 |
| N  | -1.22642 | -1.46078 | -2.32363 |
| H  | -1.46951 | -0.49015 | -2.45005 |
| C  | -0.36423 | -2.0976  | -3.31334 |
| H  | -0.33716 | -1.46819 | -4.20144 |
| H  | 0.64943  | -2.21889 | -2.92387 |
| H  | -0.76202 | -3.07717 | -3.58281 |
| N  | -1.08869 | -1.59341 | 1.67183  |
| H  | -1.17613 | -2.35135 | 2.33935  |
| C  | 0.20315  | -1.17556 | 1.52409  |
| O  | 1.11927  | -1.75962 | 2.09622  |
| C  | 0.46212  | 0.04479  | 0.70716  |
| C  | -0.27485 | 1.21372  | 0.57838  |
| N  | 1.65486  | 0.25675  | 0.0648   |
| C  | 0.56348  | 2.0616   | -0.15909 |
| H  | -1.25018 | 1.43453  | 0.97393  |
| N  | 1.71305  | 1.4926   | -0.48347 |
| Br | 0.19451  | 3.84198  | -0.69136 |
| C  | 2.72952  | -0.67141 | -0.1519  |
| C  | 4.03847  | -0.3604  | 0.29771  |
| N  | 2.42496  | -1.75841 | -0.8396  |
| C  | 4.96912  | -1.42203 | 0.23158  |
| C  | 3.36366  | -2.69303 | -1.02561 |
| C  | 4.64369  | -2.56359 | -0.47652 |
| H  | 5.93861  | -1.30532 | 0.69848  |
| H  | 3.0728   | -3.57541 | -1.5849  |
| H  | 5.36476  | -3.36668 | -0.58064 |
| Cl | 4.20322  | 0.75812  | 1.70576  |
| O  | 4.79719  | 0.95154  | -1.08342 |
| H  | 4.1126   | 1.6331   | -1.07652 |

## Supplementary material

C-Cl bond on pyridine of CLAP -  $\beta$  side -TS.xyz

|    | x        | y        | z        |
|----|----------|----------|----------|
| C  | -4.45784 | -0.05494 | 1.21678  |
| C  | -3.29447 | -0.53312 | 1.82598  |
| C  | -2.31102 | -1.14271 | 1.02527  |
| C  | -2.51093 | -1.29843 | -0.3546  |
| C  | -3.66736 | -0.78973 | -0.95116 |
| C  | -4.62433 | -0.17471 | -0.15594 |
| H  | -5.2241  | 0.41927  | 1.81679  |
| H  | -3.83061 | -0.90448 | -2.01473 |
| Cl | -6.0908  | 0.45142  | -0.90424 |
| C  | -3.10989 | -0.39043 | 3.3158   |
| H  | -2.17617 | 0.12376  | 3.55681  |
| H  | -3.9349  | 0.17145  | 3.75385  |
| H  | -3.07219 | -1.36814 | 3.80615  |
| C  | -1.56475 | -2.10522 | -1.21392 |
| O  | -1.3224  | -3.28565 | -0.95955 |
| N  | -1.07529 | -1.46515 | -2.29423 |
| H  | -1.25914 | -0.47875 | -2.39672 |
| C  | -0.19351 | -2.1162  | -3.25618 |
| H  | -0.02349 | -1.4316  | -4.08542 |
| H  | 0.76379  | -2.36934 | -2.79517 |
| H  | -0.65565 | -3.02897 | -3.63643 |
| N  | -1.12992 | -1.63209 | 1.66401  |
| H  | -1.25884 | -2.38238 | 2.33351  |
| C  | 0.16364  | -1.17852 | 1.65001  |
| O  | 1.01657  | -1.7422  | 2.32639  |
| C  | 0.46104  | 0.04706  | 0.85065  |
| C  | -0.30483 | 1.19788  | 0.73254  |
| N  | 1.64952  | 0.29443  | 0.19953  |
| C  | 0.49785  | 2.06605  | -0.01804 |
| H  | -1.27922 | 1.39212  | 1.14349  |
| N  | 1.65309  | 1.52603  | -0.36174 |
| Br | 0.07477  | 3.83499  | -0.55161 |
| C  | 2.71456  | -0.63146 | -0.08748 |
| C  | 4.09159  | -0.30007 | 0.08232  |
| N  | 2.29438  | -1.83705 | -0.44244 |
| C  | 5.00124  | -1.30045 | -0.33541 |
| C  | 3.17415  | -2.80193 | -0.71309 |
| C  | 4.54958  | -2.55916 | -0.6807  |
| H  | 6.05855  | -1.06982 | -0.32734 |
| H  | 2.77153  | -3.76647 | -1.00274 |
| H  | 5.25276  | -3.33813 | -0.95313 |
| Cl | 4.69694  | 1.39709  | -0.19384 |
| O  | 4.42795  | -0.23694 | 2.07304  |
| H  | 4.53872  | 0.69368  | 2.30305  |

## Supplementary material

C-Br bond on pyrazole of CNAP -  $\alpha$  side -TS.xyz

|    | x        | y        | z        |
|----|----------|----------|----------|
| C  | -4.64682 | -0.31336 | 0.03889  |
| C  | -4.4203  | -0.3513  | 1.41871  |
| C  | -3.21807 | -0.8353  | 1.93128  |
| C  | -2.23748 | -1.2973  | 1.03144  |
| C  | -2.47511 | -1.3003  | -0.35488 |
| C  | -3.67278 | -0.78784 | -0.84683 |
| H  | -5.18233 | 0.01282  | 2.09656  |
| H  | -3.86657 | -0.788   | -1.91179 |
| C  | -2.97752 | -0.85217 | 3.41884  |
| H  | -2.92693 | -1.87659 | 3.80175  |
| H  | -2.03301 | -0.36546 | 3.67281  |
| H  | -3.78404 | -0.34083 | 3.94435  |
| C  | -5.88218 | 0.19827  | -0.46772 |
| N  | -6.88096 | 0.61271  | -0.87707 |
| C  | -1.52631 | -1.95957 | -1.33094 |
| O  | -1.19362 | -3.13785 | -1.1983  |
| N  | -1.14659 | -1.19508 | -2.37381 |
| H  | -1.37155 | -0.21167 | -2.35989 |
| C  | -0.28477 | -1.69728 | -3.43806 |
| H  | 0.72374  | -1.88953 | -3.06486 |
| H  | -0.69372 | -2.6224  | -3.84722 |
| H  | -0.24048 | -0.94852 | -4.2272  |
| N  | -1.02278 | -1.79847 | 1.5743   |
| H  | -1.10553 | -2.57264 | 2.22296  |
| C  | 0.27325  | -1.36183 | 1.45353  |
| C  | 0.54001  | -0.08385 | 0.7545   |
| C  | -0.21866 | 1.05707  | 0.64699  |
| N  | 1.80269  | 0.22038  | 0.28593  |
| C  | 0.67253  | 2.04818  | 0.12283  |
| H  | -1.22053 | 1.22367  | 1.0001   |
| O  | 1.18384  | -2.00285 | 1.97616  |
| N  | 1.8396   | 1.51419  | -0.21856 |
| Br | 0.01199  | 3.48307  | -1.11889 |
| C  | 2.82478  | -0.67522 | -0.10423 |
| C  | 4.15307  | -0.47672 | 0.3022   |
| N  | 2.47717  | -1.699   | -0.88118 |
| C  | 5.13408  | -1.35611 | -0.13793 |
| C  | 3.41637  | -2.56289 | -1.27654 |
| C  | 4.76043  | -2.4248  | -0.94644 |
| H  | 6.16366  | -1.21516 | 0.16527  |
| H  | 3.07874  | -3.38855 | -1.89446 |
| H  | 5.49499  | -3.13522 | -1.30354 |
| Cl | 4.59766  | 0.81192  | 1.40221  |
| O  | 0.84759  | 3.24973  | 1.69957  |
| H  | 0.91012  | 4.14635  | 1.34828  |

## Supplementary material

C-Br bond on pyrazole of CNAP -  $\beta$  side -TS.xyz

|    | x        | y        | z        |
|----|----------|----------|----------|
| C  | -4.62553 | -0.28625 | -0.04434 |
| C  | -4.47163 | -0.42842 | 1.33899  |
| C  | -3.28985 | -0.93411 | 1.87612  |
| C  | -2.25624 | -1.31903 | 0.99778  |
| C  | -2.42195 | -1.22253 | -0.39603 |
| C  | -3.59771 | -0.68184 | -0.90812 |
| H  | -5.27218 | -0.12406 | 2.00179  |
| H  | -3.72751 | -0.59568 | -1.97925 |
| C  | -3.12452 | -1.0472  | 3.37053  |
| H  | -3.06157 | -2.09293 | 3.6895   |
| H  | -2.21146 | -0.5499  | 3.70719  |
| H  | -3.97281 | -0.59637 | 3.88566  |
| C  | -5.83753 | 0.25267  | -0.57694 |
| N  | -6.81813 | 0.68893  | -1.00785 |
| C  | -1.44085 | -1.81381 | -1.3878  |
| O  | -1.2537  | -3.03794 | -1.39928 |
| N  | -0.90525 | -0.96109 | -2.2712  |
| H  | -0.92191 | 0.06328  | -2.10444 |
| C  | -0.02481 | -1.44217 | -3.32876 |
| H  | 0.90037  | -1.85537 | -2.91843 |
| H  | -0.52098 | -2.21655 | -3.91773 |
| H  | 0.21672  | -0.60227 | -3.97906 |
| N  | -1.05944 | -1.82669 | 1.57611  |
| H  | -1.17284 | -2.55851 | 2.26799  |
| C  | 0.2362   | -1.36862 | 1.51903  |
| C  | 0.50544  | -0.1382  | 0.74217  |
| C  | -0.26444 | 0.98532  | 0.56354  |
| N  | 1.71161  | 0.09141  | 0.12287  |
| C  | 0.50065  | 1.82494  | -0.30648 |
| H  | -1.25047 | 1.18265  | 0.94341  |
| O  | 1.12575  | -1.96242 | 2.12438  |
| N  | 1.71885  | 1.33217  | -0.50671 |
| Br | 0.4026   | 3.85782  | -0.06264 |
| C  | 2.79568  | -0.78909 | -0.08437 |
| C  | 4.09955  | -0.44271 | 0.30447  |
| N  | 2.5299   | -1.95248 | -0.67542 |
| C  | 5.14249  | -1.31879 | 0.03103  |
| C  | 3.52863  | -2.80895 | -0.90495 |
| C  | 4.85448  | -2.5294  | -0.59034 |
| H  | 6.15375  | -1.06377 | 0.32127  |
| H  | 3.25592  | -3.74891 | -1.3736  |
| H  | 5.63969  | -3.24017 | -0.81405 |
| Cl | 4.44091  | 1.02868  | 1.19185  |
| O  | -0.44906 | 1.80415  | -1.95634 |
| H  | -1.11654 | 2.50039  | -1.90729 |

## Supplementary material

C-Cl bond on pyridine of CNAP -  $\alpha$  side -TS.xyz

|    | x        | y        | z        |
|----|----------|----------|----------|
| C  | -4.78248 | -0.20645 | -0.06489 |
| C  | -4.58274 | -0.17784 | 1.31929  |
| C  | -3.39491 | -0.64471 | 1.87912  |
| C  | -2.40139 | -1.15634 | 1.02156  |
| C  | -2.61246 | -1.22862 | -0.36746 |
| C  | -3.79664 | -0.73255 | -0.90694 |
| H  | -5.35449 | 0.22514  | 1.96323  |
| H  | -3.97155 | -0.78651 | -1.97376 |
| C  | -3.18457 | -0.59146 | 3.37034  |
| H  | -3.15985 | -1.59656 | 3.80357  |
| H  | -2.2374  | -0.10847 | 3.62145  |
| H  | -3.9932  | -0.0426  | 3.85287  |
| C  | -6.00324 | 0.29011  | -0.61997 |
| N  | -6.98978 | 0.69326  | -1.06814 |
| C  | -1.65013 | -1.94693 | -1.28757 |
| O  | -1.31023 | -3.10995 | -1.06821 |
| N  | -1.26019 | -1.25267 | -2.37433 |
| H  | -1.50754 | -0.27718 | -2.44165 |
| C  | -0.38317 | -1.82171 | -3.39261 |
| H  | 0.61326  | -2.00528 | -2.9844  |
| H  | -0.7963  | -2.76142 | -3.76319 |
| H  | -0.31212 | -1.11474 | -4.21749 |
| N  | -1.19821 | -1.63211 | 1.61266  |
| H  | -1.2935  | -2.37279 | 2.29826  |
| C  | 0.10569  | -1.24283 | 1.44732  |
| C  | 0.37495  | 0.00227  | 0.67659  |
| C  | -0.36178 | 1.17557  | 0.58936  |
| N  | 1.57209  | 0.23897  | 0.05151  |
| C  | 0.48031  | 2.05112  | -0.10978 |
| H  | -1.33841 | 1.38156  | 0.99008  |
| O  | 1.01202  | -1.86734 | 1.98715  |
| N  | 1.63284  | 1.49456  | -0.44703 |
| Br | 0.11454  | 3.84962  | -0.57767 |
| C  | 2.6591   | -0.67296 | -0.17544 |
| C  | 3.95258  | -0.37184 | 0.32349  |
| N  | 2.38208  | -1.73199 | -0.91569 |
| C  | 4.89177  | -1.42535 | 0.24314  |
| C  | 3.33238  | -2.65261 | -1.11222 |
| C  | 4.59464  | -2.53892 | -0.5198  |
| H  | 5.84617  | -1.32256 | 0.74318  |
| H  | 3.06433  | -3.51271 | -1.71584 |
| H  | 5.32347  | -3.33353 | -0.63447 |
| Cl | 4.06902  | 0.68949  | 1.78064  |
| O  | 4.73512  | 0.99987  | -0.98364 |
| H  | 4.04033  | 1.67093  | -0.97061 |

## Supplementary material

C-Cl bond on pyridine of CNAP -  $\beta$  side -TS.xyz

|    | x        | y        | z        |
|----|----------|----------|----------|
| C  | -4.73338 | -0.1817  | -0.2187  |
| C  | -4.59949 | -0.18034 | 1.17378  |
| C  | -3.44679 | -0.67492 | 1.78139  |
| C  | -2.41869 | -1.18492 | 0.96336  |
| C  | -2.5689  | -1.23581 | -0.43342 |
| C  | -3.71756 | -0.7121  | -1.0213  |
| H  | -5.39513 | 0.22323  | 1.78759  |
| H  | -3.84138 | -0.7477  | -2.09607 |
| C  | -3.31344 | -0.65424 | 3.28262  |
| H  | -3.32217 | -1.66841 | 3.69479  |
| H  | -2.37709 | -0.1868  | 3.59586  |
| H  | -4.14104 | -0.10679 | 3.73359  |
| C  | -5.91755 | 0.34527  | -0.82287 |
| N  | -6.87431 | 0.77296  | -1.31116 |
| C  | -1.58818 | -1.96898 | -1.32136 |
| O  | -1.34902 | -3.16376 | -1.14556 |
| N  | -1.07551 | -1.24989 | -2.33801 |
| H  | -1.26606 | -0.26026 | -2.37714 |
| C  | -0.17136 | -1.82737 | -3.32624 |
| H  | 0.75752  | -2.15316 | -2.85394 |
| H  | -0.63971 | -2.68276 | -3.81702 |
| H  | 0.05135  | -1.06721 | -4.07293 |
| N  | -1.2472  | -1.68376 | 1.60066  |
| H  | -1.39156 | -2.41288 | 2.29017  |
| C  | 0.05605  | -1.24225 | 1.59822  |
| C  | 0.36457  | 0.00295  | 0.83718  |
| C  | -0.40017 | 1.15815  | 0.75513  |
| N  | 1.55947  | 0.27373  | 0.2073   |
| C  | 0.40951  | 2.05299  | 0.04499  |
| H  | -1.37709 | 1.3386   | 1.16685  |
| O  | 0.89431  | -1.82888 | 2.27027  |
| N  | 1.56811  | 1.52474  | -0.30688 |
| Br | -0.0071  | 3.84044  | -0.42704 |
| C  | 2.63167  | -0.6387  | -0.09587 |
| C  | 4.00556  | -0.30599 | 0.09443  |
| N  | 2.22028  | -1.83724 | -0.48191 |
| C  | 4.92317  | -1.29254 | -0.33824 |
| C  | 3.10625  | -2.79186 | -0.76797 |
| C  | 4.48025  | -2.54452 | -0.71758 |
| H  | 5.97938  | -1.05801 | -0.31458 |
| H  | 2.71011  | -3.75085 | -1.08383 |
| H  | 5.18916  | -3.31401 | -1.00176 |
| Cl | 4.60904  | 1.3982   | -0.12884 |
| O  | 4.31396  | -0.29593 | 2.09273  |
| H  | 4.41944  | 0.62807  | 2.3503   |

## References

1. T. Xu, J. Chen, Z. Wang, W. Tang, D. Xia, Z. Fu and H. Xie, Development of Prediction Models on Base-Catalyzed Hydrolysis Kinetics of Phthalate Esters with Density Functional Theory Calculation, *Environ. Sci. Technol.*, 2019, **53**, 5828-5837.
